1 **Child diarrhea in Cambodia: A descriptive analysis of temporal and geospatial trends and**  
2 **logistic regression-based examination of factors associated with diarrhea in children under**  
3 **five years**

4 Samnang Um<sup>1</sup>, Channnarong Phan<sup>1</sup>, Sok Sakha<sup>2</sup>, Leng Dany<sup>2</sup>

5 [\\*umsam nang56@gmail.com](mailto:umsam nang56@gmail.com)

6 1- National Institute of Public Health (NIPH), Phnom Penh, Cambodia; 2-The Elite Angkor Clinic, Siem  
7 Reap, Cambodia

8  
9 **Abstract**

10  
11 Diarrhea is a global public health problem that is the third leading cause of death in under five  
12 years, with an estimated 1.7 billion cases in 2023 and 1.8 million deaths from diarrhea diseases  
13 every year. To better understand child diarrhea in Cambodia, we examined descriptively  
14 temporal and geospatial trends of diarrhea and used multivariate logistic regression to analyze its  
15 association with individual and household characteristics and diarrhea among children aged 0-59  
16 months using data from the Cambodia Demographic and Health Survey for 2005 to 2022. The  
17 prevalence of diarrhea among children aged 0–59 months decreased from 19.7% in 2005 to 6.2%  
18 in 2022. The highest prevalence of childhood diarrhea in Kampong Cham (30.1%), in Mondul  
19 Kiri/Ratanak Kiri (24.6%), Battambang/Pailin (20.9%), and Mondul Kiri/Ratanak Kiri (12.9%)  
20 for 2005, 2010, 2014 and 2022. After adjusting for other variables, factors independently  
21 associated with childhood diarrhea included mothers aged 25-34 years (adjusted odds ratio  
22 (AOR) = 0.68; 95% CI: 0.48–0.96), 35-49 years (AOR = 0.60; 95% CI: 0.42–0.87), completed  
23 higher education (AOR = 0.61; 95% CI: 0.41–0.91), and employed (AOR = 0.79; 95% CI: 0.72–  
24 0.96). Children were less likely to have diarrhea if they were older than 36 months, richest  
25 household (AOR = 0.69; 95% CI: 0.55–0.86), coastal region (AOR = 0.53; 95% CI: 0.41–0.69),  
26 born to smoker mothers (AOR = 1.61; 95% CI: 1.25–2.08), had barrier access to healthcare  
27 services (AOR = 1.20; 95% CI: 1.07–1.35), or children aged 6–23 months. Diarrhea remains  
28 highly prevalent among children in Cambodia. Public health interventions and policies to  
29 alleviate diarrhea should be prioritized to address these factors across geographical.

30

31 **Keywords:** Diarrhea prevalence, children, trends and determinants, Cambodia

32

## 33 **Introduction**

34

35 Diarrhea is defined by the World Health Organization (WHO) as passing loose or watery stool  
36 three or more times in 24 hours [1]. Although categorized in several ways, acute and persistent  
37 diarrhea are the most common classifications [1]. Persistent diarrhea is defined as diarrhea that  
38 starts acutely and lasts for more than 14 days [1]. An infection causes acute diarrhea and  
39 typically starts 12 hours to 4 days after exposure and goes away in 3 to 7 days [1]. Diarrhea is  
40 usually a symptom of an intestinal infection of various bacterial, viral, and parasitic organisms  
41 contained in food, drinking water, or from person to person due to improper hygiene [1].  
42 Diarrhea is a global public health problem that is the third leading cause of death among under  
43 five years, with an estimated 1.7 billion childhood diarrhea cases in 2023 [1]. An estimated 1.8  
44 million children under the age of five die from diarrheal illnesses every year, with over 80% of  
45 these deaths suffering in developing nations [3,4], including Southeast Asia [3,4]. In Southeast  
46 Asia, diarrheal diseases continue to rank among the top five causes of death, contributing to 6%  
47 of all deaths [2]. Even though still morbidity and mortality of children due to diarrhea are high in  
48 Cambodia, the percentage of children under five who had experienced diarrhea two weeks before  
49 the survey was 19.5% in 2005; this number slightly decreased to 15% in 2010 and 13% in 2014,  
50 and it also dramatically reduced to 6% in 2022 [3-6].

51

52 Additionally, the under-five mortality rate (U5M) in Cambodia has decreased from 124 deaths  
53 per 1,000 live births in 2000 to 16 deaths per 1,000 live births in 2022 [3-6]. However, its  
54 mortality is still unacceptably high due to various causes that are preventable. The under-5  
55 mortality rates are higher in rural areas (15 deaths per 1,000 live births and 20 deaths per 1,000  
56 live births, respectively) than in urban areas. Under-five mortality rates were highest in Ratanak  
57 Kiri province (43 deaths per 1,000 live births), Mondul Kiri province (43 deaths per 1,000 live  
58 births), Preah Vihear, and Kompong Chhang (each 36 deaths per 1,000 live births) [3-6]. Also,  
59 U5M is still higher than in the neighboring countries such as Vietnam and Thailand [7].  
60 Diarrheal illness is a significant public health concern in Cambodia. It is still one of the top 10  
61 causes of disability-adjusted life years (DALYs) across all age groups and a substantial cause of  
62 death for children [2]. Many associated factors with diarrhea included the age of children, place  
63 of residence, maternal education, and household economic condition [8-10]. Children living in

64 households using improved drinking water, improved toilet facilities, and safe waste disposal  
65 were associated with lower odds of diarrhea [8-10].

66  
67 Furthermore, breastfeeding practices, eating habits, and good handwashing practices were found  
68 to be significantly associated with diarrhea in children [8-10]. The incidence of diarrhea has been  
69 reported as compared to other developing countries, including malnutrition and early childhood  
70 mortality, which are unacceptably high in Cambodia. Furthermore, to prevent and control  
71 diarrhea in the future, it is necessary to know the trends of diarrhea over time, the geographical  
72 distributions, and associated risk factors. This enhanced understanding will help to identify sub-  
73 populations at greater risk for diarrhea and prioritize geographic areas for targeted public health  
74 interventions. To our authors' knowledge, no published peer-reviewed studies have been  
75 conducted nationally to identify determinants of diarrhea in Cambodia over time. Therefore, this  
76 study aims to explore descriptive temporal and geographical trends of diarrhea among under-five  
77 children across 2005, 2010, 2014, and 2022 CDHS surveys, identify factors associated with  
78 diarrhea among under-five children, and identify the factors that contributed positively or  
79 negatively associated with diarrhea among under-five children. Understanding these factors  
80 further supports policy development and programs with more effective strategies and  
81 interventions in Cambodia to reduce the prevalence of diarrhea among under-five children and  
82 associated health risks such as childhood mortality.

83

84

85

86 **Methods**

87

88 **Data source**

89

90 We used children’s data from the 2005, 2010, 2014, and 2022 CDHS. The CDHS is a nationally  
91 representative population-based household survey conducted roughly every five years. The  
92 survey typically uses two-stage stratified cluster sampling to collect the samples from all  
93 provinces divided into urban and rural areas. In the first stage, clusters, or enumeration areas  
94 (EAs) representing the entire country, are randomly selected from the sampling frame using  
95 probability proportional to cluster size (PPS). The second stage then systematically samples  
96 households listed in each cluster or EA. Then, interviews were conducted with women aged 15-  
97 49 who gave birth five years before the survey in the selected households. Data about the  
98 maternal and children demographic, household characteristics, health status, behaviors, and  
99 access to health care were collected when the enumerators identified children in the selected  
100 households. Details of the CDHS survey reported have been described elsewhere [3-6]. We  
101 limited our analysis to live births in the last five years before the surveys and children collected  
102 on diarrhea. This resulted in a total sample size of 30,314 (**29,742 weighted**) children 0–59  
103 months, including in the final analysis (see **Fig 1**).

104

105 **Fig 1.** The total sample size from the 2005, 2010, 2014, and 2022 CDHS

106

107 **Measurements**

108 **Outcome variable**

109 The outcome variable of this study was children under five years old having diarrhea for the last  
110 two weeks before the data collection, which was coded as "Yes = 1" and "No = 0".

111

112 **Independent variables**

113 **Maternal characteristics** included age (coded as 1 = 15–18 (reference), 2 = 19–24, 3 = 25–34,  
114 and 4 = 35–49 years); education (coded as 0 = no education (reference), 1 = primary, and 2 =  
115 secondary, and 3 = higher); employment (coded as 0 = not working (reference), 1 = working);  
116 smoking (coded as 0 = non-smoker and 1 = smoker); media exposure (coded as 0 = no and 1 =  
117 yes); and healthcare barriers was coded as a dichotomous variable with No Barriers = 0 and 1 or  
118 more barriers = 1 (possible barriers reported included distance, money, and waiting time).

119

120 **Child's characteristics** included sex of child (coded as 0 = female and 1 = male); child age  
121 (coded as 0 = 0–5 (reference), 1 = 6–11, 2 = 12–23, 3 = 24–35, 4 = 36–47, and 5 = 48–60  
122 months); birth order (coded as 1 = first child (reference), 2 = 2–3, 3 = 4–5 and 4 = 6 or more);  
123 twin birth (coded as 0 = single and 1 = twin); still breastfeeding (coded as 0 = no and 1 = yes);  
124 and received measles vaccinated (coded as 0 = no and 1 = yes); and vitamin A supplementation  
125 within the last six months (coded as 0 = no and 1 = yes).

126

127 **Household characteristics** included the DHS wealth index, coded as an ordinal level variable  
128 with richest = 1 (reference), richer = 2, middle = 3, poorer = 4, and poorest = 5 (we opted to use  
129 the wealth index that was provided by each respective survey year of the CDHS as opposed to  
130 calculating a wealth index across the pooled data. This decision was based on prior research that  
131 found wealth status designation was comparable across the CDHS-provided indices and an index  
132 based on data pooled across years) [3-6]; source of drinking water (coded as 1 = unimproved and  
133 0 = improved), type of toilet (coded as 1 = unimproved and 0 = improved; and residence (coded  
134 as 1 = urban and 2 = rural). Cambodia's domains/provinces were regrouped for analytic purposes  
135 into a categorical variable with five geographical regions that were coded as Phnom Penh capital  
136 city = 1 (reference), Plains = 2, Tonle Sap = 3, coastal/sea = 4, and mountains = 5 (Phnom Penh  
137 capital city; Plains included, Kampong Cham/Tbong Khmum, Kandal, Prey Veng, Svay Rieng,

138 and Takeo; Tonle Sap included Banteay Meanchey, Kampong Chhnang, Kampong Thom,  
139 Pursat, Siem Reap, Battambang, Pailin, and Otdar Meanchey; Coastal/sea included Kampot,  
140 Kep, Preah Sihanouk, and Koh Kong; and Mountains included Kampong Speu, Kratie, Preah  
141 Vihear, Stung Treng, Mondul Kiri, and Ratanak Kiri). Survey year was coded as 1 = 2005  
142 (reference), 2 = 2010, 3 = 2014 and 4 = 2022.

143

#### 144 **Statistical analysis**

145 Statistical analyses were performed using STATA version 18 (Stata Crop 2023, College Station,  
146 TX) [11]. We formally incorporated the DHS's complex sample design using the "survey"  
147 package; all estimations were carried out using the svy command in our descriptive and logistic  
148 regression analyses. Key maternal, child, and household characteristics were described using  
149 weighted frequency distributions for specific survey years and pooled together for all years. A  
150 temporal series of maps illustrating provincial variations in the prevalence of anemia over time  
151 was created using ArcGIS software version 10.3 [12]. Cambodian shapefile of provinces were  
152 obtained from the publicly accessible DHS website under a copyright license  
153 (<https://spatialdata.dhsprogram.com/boundaries/#view=table&countryId=KH>). Data quality  
154 assurance and minor data cleaning followed standard procedures in preparation for statistical  
155 analysis [13].

156

157 Bivariate analysis using the Chi-square test assessed associations between the variables of  
158 interest (including maternal-child, household characteristics, and geographical regions) and  
159 diarrhea status. The multivariate logistic regression analysis used variables associated with  
160 diarrhea status with a p-value  $\leq 0.05$  [14,15]. Women's age, place of residence, and survey years  
161 were included in the multivariate regression based on the literature and prior knowledge [8].  
162 Simple logistic regression was used to analyze associations between diarrhea and maternal,  
163 children, household characteristics, and geographical regions. Results are reported as unadjusted  
164 odds ratios (COR) with 95% confidence intervals (CI) and corresponding p-values. Multivariate  
165 logistic regression analysis was then used to assess independent factors associated with diarrhea  
166 after adjusting for other covariate variables in the final model. The final multivariate logistic  
167 regression results were reported as adjusted odds ratios (AOR) with 95% confidence intervals  
168 and corresponding p-values. The final multivariate logistic regression model results were

169 considered statistically significant based on a p-value less than 0.05 and 95% confidence  
170 intervals that did not cross an AOR of 1.0. Potential multi-collinearity between right-hand-sided  
171 variables was checked using a continuous version of the outcome variable and evaluating VIF  
172 scores after fitting a regression model (S1 **Table**).

173

#### 174 **Ethical consideration**

175 The Cambodia Demographic and Health Survey (CDHS) 2005-2022 was approved by the  
176 Cambodia National Ethics Committee for Health Research and ICF's Institutional Review Board  
177 (IRB) in Rockville, Maryland, USA. The study participants were informed about the survey  
178 before their interview, and for each participant under 18 years old, signed informed consent was  
179 obtained from their parents or guardians. CDHS data are publicly accessible upon request  
180 through the DHS website at (URL: <https://dhsprogram.com/data/available-datasets.cfm>)  
181 following permission obtained through an online request outlining the purpose of our  
182 investigation and removing all participant personal information. The details about the CDHS's  
183 report [3-6].

184

#### 185 **Results**

186

187 The pooled data included 29,742 children aged 0–59 months; there were 7,220 in 2005, 7,758 in  
188 2010, 7,010 in 2014, and 7,754 in 2022, respectively. Overall, 21.7% had a mother above 35  
189 years old, 31.3% had a mother who had at least completed secondary education, 16.6% did not  
190 receive formal schooling, 37.2% had an unemployed mother, and 2.9% had a mother who  
191 smoked. 34.1% of children were first-order births, and 6.7% were sixth- or high-order births.  
192 1.4% of children were twins, 49.5% were girls, 46.3% were still breastfeeding, 60.9% received  
193 the measles vaccine, and 49.1% were Vitamin A intake. Regarding households characterized by  
194 children, 78.8% resided in rural areas, 24.6% belonged to the poorest families, 45.8% belonged  
195 to households drinking unimproved water, and 51.0% were unimproved toilets (see **Table 1**).

196

197

198

199

200

201 Table 1. Descriptive statistics of individual and household socio-demographic characteristics

202

| Variables                                 | 2005      |      | 2010      |      | 2014      |      | 2022      |      | 2005-2022  |      |
|-------------------------------------------|-----------|------|-----------|------|-----------|------|-----------|------|------------|------|
|                                           | (n=7,220) |      | (n=7,758) |      | (n=7,010) |      | (n=7,754) |      | (n=29,742) |      |
|                                           | Freq.     | %    | Freq.     | %    | Freq.     | %    | Freq.     | %    | Freq.      | %    |
| <b>Had diarrhea in the past two weeks</b> |           |      |           |      |           |      |           |      |            |      |
| Not diarrhea                              | 5,800     | 80.3 | 6,597     | 85.0 | 6,108     | 87.1 | 7,276     | 93.8 | 25,782     | 86.7 |
| Diarrhea                                  | 1,420     | 19.7 | 1,161     | 15.0 | 902       | 12.9 | 477       | 6.2  | 3,960      | 13.3 |
| <b>Maternal Characteristic</b>            |           |      |           |      |           |      |           |      |            |      |
| <b>Age (years)</b>                        |           |      |           |      |           |      |           |      |            |      |
| <19                                       | 89        | 1.2  | 90        | 1.2  | 92        | 1.2  | 98        | 1.3  | 370        | 1.2  |
| 19-24                                     | 1,918     | 26.6 | 1,825     | 23.5 | 1,828     | 23.6 | 1,457     | 18.8 | 7,029      | 23.6 |
| 25-34                                     | 3,321     | 46.0 | 4,282     | 55.2 | 4,022     | 51.8 | 4,269     | 55.0 | 15,894     | 53.4 |
| 35-49                                     | 1,891     | 26.2 | 1,561     | 20.1 | 1,068     | 13.8 | 1,930     | 24.9 | 6,450      | 21.7 |
| <b>Educational</b>                        |           |      |           |      |           |      |           |      |            |      |
| No education                              | 1,720     | 23.8 | 1,419     | 18.3 | 962       | 12.4 | 841       | 10.8 | 4,942      | 16.6 |
| Primary                                   | 4,251     | 58.9 | 4,385     | 56.5 | 3,675     | 47.4 | 3,183     | 41.0 | 15,494     | 52.1 |
| Secondary                                 | 1,207     | 16.7 | 1,833     | 23.6 | 2,175     | 28.0 | 3,160     | 40.7 | 8,375      | 28.2 |
| Higher                                    | 42        | 0.6  | 120       | 1.5  | 198       | 2.6  | 570       | 7.3  | 931        | 3.1  |
| <b>Employment</b>                         |           |      |           |      |           |      |           |      |            |      |
| Not working                               | 2,952     | 40.9 | 2,629     | 33.9 | 2,523     | 36.0 | 2,958     | 38.1 | 11,061     | 37.2 |
| Working                                   | 4,267     | 59.1 | 5,130     | 66.1 | 4,483     | 64.0 | 4,796     | 61.9 | 18,676     | 62.8 |
| <b>Smoking</b>                            |           |      |           |      |           |      |           |      |            |      |
| No-smoker                                 | 6,878     | 95.3 | 7,546     | 97.3 | 6,813     | 97.2 | 7,653     | 98.7 | 28,890     | 97.1 |
| Smoker                                    | 342       | 4.7  | 212       | 2.7  | 197       | 2.8  | 100       | 1.3  | 852        | 2.9  |
| <b>Media exposure</b>                     |           |      |           |      |           |      |           |      |            |      |
| No                                        | 6,846     | 94.8 | 7,427     | 95.7 | 6,808     | 97.1 | 7,654     | 98.7 | 28,736     | 96.6 |
| Yes                                       | 374       | 5.2  | 331       | 4.3  | 202       | 2.9  | 99        | 1.3  | 1,006      | 3.4  |
| <b>Healthcare Barriers</b>                |           |      |           |      |           |      |           |      |            |      |
| No barrier                                | 1,084     | 15.0 | 2,181     | 28.1 | 1,753     | 25.0 | 3,160     | 40.8 | 8,178      | 27.5 |
| One or More Barriers                      | 6,136     | 85.0 | 5,578     | 71.9 | 5,257     | 75.0 | 4,594     | 59.2 | 21,564     | 72.5 |
| <b>Child Characteristics</b>              |           |      |           |      |           |      |           |      |            |      |
| <b>Age(months)</b>                        |           |      |           |      |           |      |           |      |            |      |
| 0-5m                                      | 743       | 10.3 | 710       | 9.2  | 732       | 10.4 | 760       | 9.8  | 2,946      | 9.9  |
| 6-11m                                     | 769       | 10.7 | 825       | 10.6 | 759       | 10.8 | 809       | 10.4 | 3,163      | 10.6 |
| 12-23m                                    | 1,513     | 21.0 | 1,608     | 20.7 | 1,457     | 20.8 | 1,642     | 21.2 | 6,220      | 20.9 |
| 24-35m                                    | 1,411     | 19.5 | 1,601     | 20.6 | 1,360     | 19.4 | 1,496     | 19.3 | 5,866      | 19.7 |
| 36-47m                                    | 1,409     | 19.5 | 1,517     | 19.6 | 1,332     | 19.0 | 1,519     | 19.6 | 5,777      | 19.4 |
| 48-60m                                    | 1,374     | 19.0 | 1,498     | 19.3 | 1,370     | 19.5 | 1,528     | 19.7 | 5,770      | 19.4 |
| <b>Sex</b>                                |           |      |           |      |           |      |           |      |            |      |
| Boys                                      | 3,584     | 49.6 | 4,006     | 51.6 | 3,506     | 50.0 | 3,935     | 50.7 | 15,031     | 50.5 |
| Girls                                     | 3,636     | 50.4 | 3,752     | 48.4 | 3,504     | 50.0 | 3,819     | 49.3 | 14,711     | 49.5 |
| <b>Birth order</b>                        |           |      |           |      |           |      |           |      |            |      |
| 1 child                                   | 2,008     | 27.8 | 2,664     | 34.3 | 2,734     | 39.0 | 2,747     | 35.4 | 10,152     | 34.1 |
| 2-3 child                                 | 2,866     | 39.7 | 3,365     | 43.4 | 3,185     | 45.4 | 4,172     | 53.8 | 13,588     | 45.7 |
| 4-5 child                                 | 1,389     | 19.2 | 1,117     | 14.4 | 801       | 11.4 | 699       | 9.0  | 4,006      | 13.5 |



|                                  |       |      |       |      |       |      |       |      |        |      |
|----------------------------------|-------|------|-------|------|-------|------|-------|------|--------|------|
| ≥ 6 child                        | 958   | 13.3 | 613   | 7.9  | 290   | 4.1  | 135   | 1.7  | 1,996  | 6.7  |
| <b>Twin</b>                      |       |      |       |      |       |      |       |      |        |      |
| Single                           | 7,129 | 98.7 | 7,649 | 98.6 | 6,889 | 98.3 | 7,672 | 98.9 | 29,339 | 98.6 |
| Multiple                         | 91    | 1.3  | 109   | 1.4  | 121   | 1.7  | 82    | 1.1  | 403    | 1.4  |
| <b>Still breastfeeding</b>       |       |      |       |      |       |      |       |      |        |      |
| No                               | 3,153 | 43.7 | 3,898 | 50.2 | 3,836 | 54.7 | 5,091 | 65.7 | 15,978 | 53.7 |
| Yes                              | 4,067 | 56.3 | 3,860 | 49.8 | 3,174 | 45.3 | 2,663 | 34.3 | 13,763 | 46.3 |
| <b>Measles' vaccine</b>          |       |      |       |      |       |      |       |      |        |      |
| Not vaccinated                   | 2,621 | 36.3 | 2,349 | 30.3 | 1,999 | 28.5 | 4,660 | 60.1 | 11,629 | 39.1 |
| Vaccinated                       | 4,599 | 63.7 | 5,409 | 69.7 | 5,011 | 71.5 | 3,094 | 39.9 | 18,113 | 60.9 |
| <b>Vitamin A supplement</b>      |       |      |       |      |       |      |       |      |        |      |
| No                               | 4,836 | 67.0 | 2,771 | 35.7 | 2,560 | 36.5 | 4,960 | 64.0 | 15,127 | 50.9 |
| Yes                              | 2,383 | 33.0 | 4,987 | 64.3 | 4,451 | 63.5 | 2,794 | 36.0 | 14,615 | 49.1 |
| <b>Household Characteristics</b> |       |      |       |      |       |      |       |      |        |      |
| <b>Wealth index</b>              |       |      |       |      |       |      |       |      |        |      |
| Poorest                          | 1,930 | 26.7 | 2,035 | 26.2 | 1,684 | 24.0 | 1,668 | 21.5 | 7,317  | 24.6 |
| Poorer                           | 1,639 | 22.7 | 1,657 | 21.4 | 1,401 | 20.0 | 1,445 | 18.6 | 6,141  | 20.6 |
| Middle                           | 1,273 | 17.6 | 1,417 | 18.3 | 1,331 | 19.0 | 1,439 | 18.6 | 5,460  | 18.4 |
| Richer                           | 1,171 | 16.2 | 1,355 | 17.5 | 1,210 | 17.3 | 1,654 | 21.3 | 5,390  | 18.1 |
| Richest                          | 1,206 | 16.7 | 1,295 | 16.7 | 1,384 | 19.7 | 1,549 | 20.0 | 5,434  | 18.3 |
| <b>Place of residence</b>        |       |      |       |      |       |      |       |      |        |      |
| Urban                            | 1,017 | 14.1 | 1,232 | 15.9 | 1,014 | 14.5 | 3,048 | 39.3 | 6,310  | 21.2 |
| Rural                            | 6,203 | 85.9 | 6,527 | 84.1 | 5,996 | 85.5 | 4,706 | 60.7 | 23,432 | 78.8 |
| <b>Region</b>                    |       |      |       |      |       |      |       |      |        |      |
| Phnom Penh                       | 580   | 8.0  | 622   | 8.0  | 603   | 8.6  | 1,131 | 14.6 | 2,936  | 9.9  |
| Plain                            | 2,766 | 38.3 | 3,068 | 39.5 | 2,580 | 36.8 | 2,576 | 33.2 | 10,990 | 37.0 |
| Tonle Sap                        | 2,381 | 33.0 | 2,509 | 32.3 | 2,251 | 32.1 | 2,504 | 32.3 | 9,644  | 32.4 |
| Coastal                          | 548   | 7.6  | 503   | 6.5  | 433   | 6.2  | 458   | 5.9  | 1,942  | 6.5  |
| Mountain                         | 945   | 13.1 | 1,056 | 13.6 | 1,144 | 16.3 | 1,085 | 14.0 | 4,229  | 14.2 |
| <b>Drinking water</b>            |       |      |       |      |       |      |       |      |        |      |
| Improved                         | 3,755 | 52.0 | 4,222 | 54.4 | 3,516 | 50.2 | 4,629 | 59.7 | 16,122 | 54.2 |
| Unimproved                       | 3,464 | 48.0 | 3,536 | 45.6 | 3,494 | 49.8 | 3,125 | 40.3 | 13,619 | 45.8 |
| <b>Toilet facility</b>           |       |      |       |      |       |      |       |      |        |      |
| Improved                         | 1,567 | 21.7 | 2,772 | 35.7 | 3,488 | 49.8 | 6,748 | 87.0 | 14,574 | 49.0 |
| Non-Improved                     | 5,653 | 78.3 | 4,986 | 64.3 | 3,522 | 50.2 | 1,006 | 13.0 | 15,167 | 51.0 |

203 Notes: Survey weights applied to obtain weighted percentages across survey years and pooled data. \*Phnom Penh  
 204 capital city; Plains: Kampong Cham, Tbong Khmum, Kandal, Prey Veng, Svay Rieng, and Takeo; Tonle Sap:  
 205 Banteay Meanchey, Kampong Chhnang, Kampong Thom, Pursat, Siem Reap, Battambang, Pailin, and Otdar  
 206 Meanchey; Coastal/sea: Kampot, Kep, Preah Sihanouk, and Koh Kong; Mountains: Kampong Speu, Kratie, Preah  
 207 Vihear, Stung Treng, Mondul Kiri, and Ratanak Kiri.

208  
 209 The overall prevalence trend of children aged 0–59 months having diarrhea in the previous two  
 210 weeks significantly declined from 19.7% in 2005 to 15.0% in 2010 to 12.9% in 2014 and  
 211 decreased to 6.2% in 2022 (see **Table 1**). When stratified by age, the diarrhea trend peaked at  
 212 around 30% among children aged 6–23 months in 2005. However, this trend among this age  
 213 group gradually declined to less than 24% in 2010, 17% in 2014, and 12% in 2022 (see **Fig 2**).

214  
215  
216  
217  
218  
219  
220  
221  
222  
223  
224  
225  
226  
227  
228  
229  
230  
231  
232  
233  
234  
235  
236  
237  
238  
239  
240  
241  
242  
243  
244

**Fig 2.** Age distribution trends of diarrhea among children 0–59 months in the last two weeks by survey years, CDHS 2000 to 2022. Notes: Survey weights were applied to obtain weighted percentages across survey years and pooled data.

The extent of this downward trend varied across the five geographical regions; the highest prevalence of diarrhea was in the Plain region in 2005 (21.7%). The Phnom Penh capital had the lowest prevalence of diarrhea across all survey years, with prevalence levels in 2022 that were lower than those of other regions (see **Fig 3**). Diarrhea was highest among children in Kampong Cham (30.1%), in Mondul Kiri/Ratanak Kiri (24.6%), in Battambang/Pailin (20.9%), and Mondul Kiri/Ratanak Kiri (12.9%) for 2005, 2010, 2014 and 2022, respectively (see **Fig 4**). The lowest prevalence of diarrhea among children was observed in Preah Sihanouk and Koh Kong provinces (9.1%), in Kampong Speu (7.5%), in Prey Veng (4.7%), and in Otdar Meanchey (1%) for 2005, 2010, 2014 and 2022.

**Fig 3.** Overall and regional trends of diarrhea among children 0–59 months in the last two weeks by survey years, CDHS 2000 to 2022. Notes: Survey weights applied to obtain weighted percentages across survey years and pooled data.

**Fig 4.** Geographical distribution of diarrhea among children 0–59 months in the last two weeks by survey years, CDHS 2000 to 2022. Cambodian shapefile of provinces were obtained from the publicly accessible DHS website under a copyright license (<https://spatialdata.dhsprogram.com/boundaries/#view=table&countryId=KH>). Notes: Survey weights applied to obtain weighted percentages across survey years and pooled data.

245 Preliminary analyses included the evaluation of cross-tabular frequency distributions combined  
246 with Chi-square tests (see **Table 2**). Maternal age was significantly associated with the risk of  
247 diarrhea in children in all survey years; the most significant percentage of children with diarrhea  
248 were those with younger mothers aged less than 19 years (25.8% in 2005, 27.8% in 2010, 20.7%  
249 in 2014 and 13.3%). Maternal educational attainment was significantly associated with diarrhea  
250 in children in all survey years; the most significant percentage of children with diarrhea were  
251 generally those whose mothers had no formal education (21.5% in 2005, 17.5% in 2010, 13.4%  
252 in 2014, and 6.3% in 2022). Maternal unemployment was also significantly associated with  
253 diarrhea in children in survey years 2005, 2014, and 2022; the prevalence of diarrhea among  
254 children who had unemployed mothers was 21.5% in 2005, 15.2% in 2014, and 7.6% in 2022.  
255 Maternal smoking of cigarettes was also significantly associated with diarrhea in children in  
256 survey years 2010 and 2014; the prevalence of diarrhea among children who had mothers  
257 smoking cigarettes was 25.0% in 2010 and 23.9% in 2014. Maternal who had at least one barrier  
258 access to healthcare were also significantly associated with diarrhea in children in all surveys;  
259 the most significant percentage of children with diarrhea were generally those whose mothers  
260 had at least one barrier access to healthcare (20.5% in 2005, 15.8% in 2010, 13.4% in 2014, and  
261 7.0% in 2022). Diarrhea was related to children's ages, with a higher prevalence in the age group  
262 of 6 to 11 months (6–11 months: 32% in 2005, 26.5% in 2010, 20% in 2014 and 11.6% in 2022;  
263 12–23 months: 28.0%, 21.1%, 19.0% and 9.4%, respectively). In addition, diarrhea among boys  
264 was higher than among girls: 22.0% in 2005 and 16.1% in 2014. Breastfeeding children had a  
265 higher prevalence of diarrhea (21.8% in 2005, 17.7% in 2010, 14.2% in 2014, and 8.7% in  
266 2022). Measles vaccination was also associated with lower diarrhea in children at 18.5% in 2005,  
267 18.6% in 2010, and 14.2% in 2014. The proportion of children with diarrhea in rural areas was  
268 higher than in urban areas: 20.2% in 2005, 15.8% in 2010, and 7.2% in 2022. The proportion of  
269 children with diarrhea was lowest among children in the Coastal region in the survey years 2005,  
270 2010, and 2014: 10.4% in 2005, 14.9% in 2010, 9.7% in 2014, and Phnom Penh capital city was  
271 2.5% in 2022, respectively. Diarrhea was also associated with household toilet facilities in  
272 survey years 2005 and 2010; 21.1% in 2005 and 16.6% in 2010 of children in households that  
273 reported having non-improved toilet facilities were diarrhea. The proportion of children with  
274 diarrhea was highest among children in the poorest households across all the survey years:  
275 22.6% in 2005, 18.5% in 2010, 16.1% in 2014, and 8.2% in 2022, respectively.

276 **Table 2.** Chi-square test results for associations between child diarrhea and child, maternal, and household characteristics  
 277

| Variables                      | 2005 (n=7,220) |            |         | 2010 (n=7,758) |            |         | 2014 (n=7,010) |            |         | 2022 (n=7,754) |          |         |
|--------------------------------|----------------|------------|---------|----------------|------------|---------|----------------|------------|---------|----------------|----------|---------|
|                                | % Not diarrhea | % Diarrhea | P value | % Not diarrhea | % Diarrhea | P value | % Not diarrhea | % Diarrhea | P value | % Not diarrhea | Diarrhea | P value |
| <b>Maternal Characteristic</b> |                |            |         |                |            |         |                |            |         |                |          |         |
| <b>Age (years)</b>             |                |            |         |                |            |         |                |            |         |                |          |         |
| <19                            | 74.2           | 25.8       | 0.029   | 72.2           | 27.8       | <0.001  | 79.3           | 20.7       | <0.001  | 86.7           | 13.3     | <0.001  |
| 19-24                          | 77.7           | 22.3       |         | 81.2           | 18.8       |         | 83.7           | 16.3       |         | 91.0           | 9.0      |         |
| 25-34                          | 80.8           | 19.2       |         | 86.0           | 14.0       |         | 87.8           | 12.2       | <0.001  | 94.9           | 5.1      |         |
| 35-49                          | 82.5           | 17.5       |         | 87.6           | 12.4       |         | 91.1           | 8.9        |         | 94.0           | 6.0      |         |
| <b>Educational</b>             |                |            |         |                |            |         |                |            |         |                |          |         |
| No education                   | 78.4           | 21.5       | 0.008   | 82.6           | 17.5       | <0.001  | 86.6           | 13.4       |         | 93.6           | 6.3      | 0.001   |
| Primary                        | 79.9           | 20.1       |         | 84.2           | 15.8       |         | 87.0           | 13.0       |         | 92.4           | 7.6      |         |
| Secondary                      | 84.1           | 15.9       |         | 88.4           | 11.6       |         | 87.3           | 12.7       |         | 94.8           | 5.2      |         |
| Higher                         | 90.5           | 9.5        |         | 94.2           | 6.7        |         | 90.4           | 9.6        |         | 96.7           | 3.3      |         |
| <b>Employment</b>              |                |            |         |                |            |         |                |            |         |                |          |         |
| Not working                    | 78.1           | 21.9       | 0.002   | 84.4           | 15.6       | 0.357   | 84.8           | 15.2       | 0.004   | 92.4           | 7.6      | <0.001  |
| Working                        | 81.9           | 18.1       |         | 85.4           | 14.6       |         | 88.4           | 11.6       |         | 94.7           | 5.3      |         |
| <b>Smoking</b>                 |                |            |         |                |            |         |                |            |         |                |          |         |
| No-smoker                      | 80.5           | 19.5       | 0.145   | 85.3           | 14.7       | 0.026   | 87.5           | 12.5       | <0.001  | 93.9           | 6.1      | 0.147   |
| Smoker                         | 77.2           | 22.8       |         | 75.5           | 25.0       |         | 76.1           | 23.9       |         | 91.0           | 9.0      |         |
| <b>Media exposure</b>          |                |            |         |                |            |         |                |            |         |                |          |         |
| No                             | 80.1           | 19.9       | 0.103   | 84.9           | 15.1       | 0.096   | 87.0           | 13.0       | 0.162   | 93.8           | 6.2      | 0.375   |
| Yes                            | 85.0           | 15.0       |         | 88.8           | 11.2       |         | 91.1           | 8.9        |         | 96.0           | 4.0      |         |
| <b>Healthcare Barriers</b>     |                |            |         |                |            |         |                |            |         |                |          |         |
| No barrier                     | 85.2           | 14.9       | <0.001  | 87.1           | 12.9       | 0.020   | 88.9           | 11.2       | 0.038   | 95.1           | 4.9      | 0.003   |
| One or More Barriers           | 79.5           | 20.5       |         | 84.2           | 15.8       |         | 86.6           | 13.4       |         | 93.0           | 7.0      |         |
| <b>Child Characteristics</b>   |                |            |         |                |            |         |                |            |         |                |          |         |
| <b>Age(months)</b>             |                |            |         |                |            |         |                |            |         |                |          |         |
| 0-5m                           | 82.4           | 17.6       | <0.001  | 85.8           | 14.2       | <0.001  | 87.2           | 12.8       | <0.001  | 94.1           | 5.9      | <0.001  |
| 6-11m                          | 68.1           | 32.0       |         | 73.5           | 26.5       |         | 80.0           | 20.0       |         | 88.4           | 11.6     |         |
| 12-23m                         | 72.0           | 28.0       |         | 78.9           | 21.1       |         | 81.0           | 19.0       |         | 90.6           | 9.4      |         |
| 24-35m                         | 79.4           | 20.6       |         | 86.2           | 13.8       |         | 86.2           | 13.8       |         | 94.7           | 5.3      |         |
| 36-47m                         | 86.2           | 13.8       |         | 90.2           | 9.8        |         | 92.5           | 7.5        |         | 96.1           | 3.8      |         |

|                                  |      |      |        |      |      |        |      |      |        |      |     |        |
|----------------------------------|------|------|--------|------|------|--------|------|------|--------|------|-----|--------|
| 48-60m                           | 90.0 | 9.9  |        | 91.2 | 8.8  |        | 93.4 | 6.6  |        | 96.9 | 3.1 |        |
| <b>Sex</b>                       |      |      |        |      |      |        |      |      |        |      |     |        |
| Boys                             | 78.0 | 22.0 | <0.001 | 83.9 | 16.1 | 0.029  | 86.5 | 13.5 | 0.220  | 93.6 | 6.4 | 0.532  |
| Girls                            | 82.6 | 17.4 |        | 86.2 | 13.8 |        | 87.8 | 12.2 |        | 94.1 | 5.9 |        |
| <b>Birth order</b>               |      |      |        |      |      |        |      |      |        |      |     |        |
| 1 child                          | 80.5 | 19.5 | 0.546  | 84.5 | 15.5 | 0.880  | 85.9 | 14.1 | 0.135  | 93.5 | 6.5 | 0.321  |
| 2-3 child                        | 79.9 | 20.1 |        | 85.2 | 14.8 |        | 87.6 | 12.4 |        | 94.3 | 5.7 |        |
| 4-5 child                        | 81.8 | 18.2 |        | 85.4 | 14.6 |        | 88.0 | 12.0 |        | 92.7 | 7.3 |        |
| ≥ 6 child                        | 79.1 | 20.8 |        | 85.6 | 14.4 |        | 91.4 | 8.6  |        | 91.9 | 8.1 |        |
| <b>Twin</b>                      |      |      |        |      |      |        |      |      |        |      |     |        |
| Single                           | 80.3 | 19.7 | 0.542  | 85.0 | 15.0 | 0.600  | 87.3 | 12.7 | 0.127  | 93.8 | 6.2 | 0.951  |
| Multiple                         | 83.5 | 16.5 |        | 88.1 | 11.9 |        | 78.5 | 21.5 |        | 93.9 | 6.1 |        |
| <b>Still breastfeeding</b>       |      |      |        |      |      |        |      |      |        |      |     |        |
| No                               | 83.1 | 16.9 | <0.001 | 87.8 | 12.2 | <0.001 | 88.3 | 11.8 | 0.021  | 95.2 | 4.8 | <0.001 |
| Yes                              | 78.2 | 21.8 |        | 82.3 | 17.7 |        | 85.8 | 14.2 |        | 91.3 | 8.7 |        |
| <b>Measles' vaccine</b>          |      |      |        |      |      |        |      |      |        |      |     |        |
| Not vaccinated                   | 78.6 | 21.4 | 0.020  | 81.8 | 18.2 | <0.001 | 83.7 | 16.3 | <0.001 | 95.1 | 4.9 | <0.001 |
| Vaccinated                       | 81.3 | 18.7 |        | 86.4 | 13.6 |        | 88.5 | 11.5 |        | 92.0 | 8.0 |        |
| <b>Vitamin A supplement</b>      |      |      |        |      |      |        |      |      |        |      |     |        |
| No                               | 81.5 | 18.5 | 0.004  | 84.0 | 16.0 | 0.132  | 87.9 | 12.1 | 0.301  | 94.1 | 5.9 | 0.261  |
| Yes                              | 77.9 | 22.1 |        | 85.6 | 14.4 |        | 86.7 | 13.3 |        | 93.3 | 6.7 |        |
| <b>Household Characteristics</b> |      |      |        |      |      |        |      |      |        |      |     |        |
| <b>Wealth index</b>              |      |      |        |      |      |        |      |      |        |      |     |        |
| Poorest                          | 77.4 | 22.6 | <0.001 | 81.5 | 18.5 | <0.001 | 83.9 | 16.1 | 0.012  | 91.8 | 8.2 | <0.001 |
| Poorer                           | 79.1 | 20.9 |        | 84.1 | 15.9 |        | 88.2 | 11.8 |        | 91.6 | 8.4 |        |
| Middle                           | 80.2 | 19.8 |        | 84.8 | 15.2 |        | 89.5 | 10.5 |        | 94.9 | 5.1 |        |
| Richer                           | 81.6 | 18.4 |        | 87.9 | 12.1 |        | 86.3 | 13.7 |        | 94.8 | 5.1 |        |
| Richest                          | 85.7 | 14.3 |        | 89.1 | 10.9 |        | 88.6 | 11.4 |        | 96.1 | 3.9 |        |
| <b>Place of residence</b>        |      |      |        |      |      |        |      |      |        |      |     |        |
| Urban                            | 83.3 | 16.6 | 0.027  | 89.3 | 10.6 | <0.001 | 87.2 | 12.7 | 0.926  | 95.5 | 4.5 | 0.002  |
| Rural                            | 79.8 | 20.2 |        | 84.2 | 15.8 |        | 87.1 | 12.9 |        | 92.8 | 7.2 |        |
| <b>Region</b>                    |      |      |        |      |      |        |      |      |        |      |     |        |
| Phnom Penh                       | 81.0 | 19.0 | <0.001 | 88.1 | 11.9 | 0.017  | 82.4 | 17.7 | <0.001 | 97.5 | 2.5 | 0.006  |
| Plain                            | 78.3 | 21.7 |        | 84.4 | 15.6 |        | 89.2 | 10.8 |        | 93.3 | 6.8 |        |
| Tonle Sap                        | 80.8 | 19.1 |        | 83.4 | 16.6 |        | 86.3 | 13.7 |        | 93.1 | 6.9 |        |

|                        |      |      |        |      |      |        |      |      |       |      |     |       |
|------------------------|------|------|--------|------|------|--------|------|------|-------|------|-----|-------|
| Coastal                | 89.6 | 10.4 |        | 85.3 | 14.9 |        | 90.3 | 9.7  |       | 94.8 | 5.2 |       |
| Mountain               | 79.3 | 20.7 |        | 89.0 | 11.0 |        | 85.3 | 14.7 |       | 92.7 | 7.2 |       |
| <b>Drinking water</b>  |      |      |        |      |      |        |      |      |       |      |     |       |
| Improved               | 79.8 | 20.2 | 0.354  | 85.3 | 14.7 | 0.648  | 88.5 | 11.5 | 0.022 | 94.4 | 5.6 | 0.055 |
| Unimproved             | 80.9 | 19.1 |        | 84.8 | 15.3 |        | 85.8 | 14.2 |       | 93.0 | 7.0 |       |
| <b>Toilet facility</b> |      |      |        |      |      |        |      |      |       |      |     |       |
| Improved               | 85.4 | 14.6 | <0.001 | 88.0 | 12.0 | <0.001 | 87.9 | 12.1 | 0.205 | 93.9 | 6.1 | 0.700 |
| Non-Improved           | 78.9 | 21.1 |        | 83.4 | 16.6 |        | 86.3 | 13.7 |       | 93.5 | 6.5 |       |

278 Notes: Survey weights applied to obtain weighted percentages across survey years and pooled data. \*Phnom Penh capital city; Plains: Kampong Cham, Tbong  
279 Khmum, Kandal, Prey Veng, Svay Rieng, and Takeo; Tonle Sap: Banteay Meanchey, Kampong Chhnang, Kampong Thom, Pursat, Siem Reap, Battambang,  
280 Pailin, and Otdar Meanchey; Coastal/sea: Kampot, Kep, Preah Sihanouk, and Koh Kong; Mountains: Kampong Speu, Kratie, Preah Vihear, Stung Treng,  
281 Mondul Kiri, and Ratanak Kiri.

282 As shown in **Table 3**, several factors were independently associated with children’s decreased  
283 odds of having diarrhea in the last two weeks. These factors included children born to mothers  
284 aged 25-34 years (AOR = 0.68; 95% CI: 0.48–0.96), 35-49 years (AOR = 0.60; 95% CI: 0.42–  
285 0.87), born to mothers with secondary education (AOR = 0.84; 95% CI: 0.72–0.98), higher  
286 educated (AOR = 0.61; 95% CI: 0.41–0.91), employed mothers (AOR = 0.79; 95% CI: 0.72–  
287 0.96). For age, children aged 36–47 months (AOR = 0.64; 95% CI: 0.52–0.79) and 48–60  
288 months (AOR = 0.52; 95% CI: 0.42–0.66) were less likely to be diarrhea than those aged 0–5  
289 months. Also, children had lower odds of having diarrhea if they were from middle households  
290 (AOR = 0.77; 95% CI: 0.67–0.89), richer households (AOR = 0.79; 95% CI: 0.66–0.93), richest  
291 households (AOR = 0.69; 95% CI: 0.55–0.86). In addition, children had lower odds of having  
292 diarrhea if they were from the coastal region (AOR = 0.53; 95% CI: 0.41–0.69), mountain region  
293 (AOR = 0.67; 95% CI: 0.53–0.85), survey years in 2010 (AOR = 0.74; 95% CI: 0.64–0.85),  
294 2014 (AOR = 0.62; 95% CI: 0.54–0.72), 2022 (AOR = 0.32; 95% CI: 0.26–0.38). However,  
295 children were more likely to have diarrhea if they were born to smoker mothers (AOR = 1.61;  
296 95% CI: 1.25–2.08) compared to non-smokers. Children born to mothers who reported having at  
297 least one barrier access to healthcare service (AOR = 1.20; 95% CI: 1.07–1.35) compared to  
298 those without and children aged 6–11 months (AOR = 2.05; 95% CI: 1.66–2.52), 12–23 months  
299 (AOR = 1.68; 95% CI: 1.39–2.04).

300  
301  
302  
303  
304

305 **Table 3.** Unadjusted and adjusted analyses of child diarrhea in Cambodia

| Variables                      | 2005-2022 (n=29,742) |            | P value | 2005-2022 (n=29,742) |             | 2005-2022 (n=29,742) |             |
|--------------------------------|----------------------|------------|---------|----------------------|-------------|----------------------|-------------|
|                                | % Not diarrhea       | % Diarrhea |         | OR                   | 95% CI      | AOR                  | 95% CI      |
| <b>Maternal Characteristic</b> |                      |            |         |                      |             |                      |             |
| <b>Age (years)</b>             |                      |            |         |                      |             |                      |             |
| <19                            | 78.4                 | 21.6       | <0.001  | Ref.                 |             | Ref.                 |             |
| 19-24                          | 82.9                 | 17.1       |         | 0.75                 | (0.54-1.04) | 0.85                 | (0.61-1.20) |
| 25-34                          | 87.8                 | 12.2       |         | 0.51 <sup>***</sup>  | (0.37-0.70) | 0.68 <sup>*</sup>    | (0.48-0.96) |
| 35-49                          | 88.6                 | 11.4       |         | 0.47 <sup>***</sup>  | (0.34-0.65) | 0.60 <sup>**</sup>   | (0.42-0.87) |
| <b>Educational</b>             |                      |            |         |                      |             |                      |             |
| No education                   | 83.8                 | 16.2       | <0.001  | Ref.                 |             | Ref.                 |             |
| Primary                        | 85.4                 | 14.6       |         | 0.89 <sup>*</sup>    | (0.79-0.99) | 0.99                 | (0.88-1.11) |
| Secondary                      | 89.9                 | 10.1       |         | 0.58 <sup>***</sup>  | (0.51-0.67) | 0.84 <sup>*</sup>    | (0.72-0.98) |
| Higher                         | 94.6                 | 5.4        |         | 0.29 <sup>***</sup>  | (0.20-0.43) | 0.61 <sup>*</sup>    | (0.41-0.91) |
| <b>Employment</b>              |                      |            |         |                      |             |                      |             |
| Not working                    | 84.9                 | 15.1       | <0.001  | Ref.                 |             | Ref.                 |             |
| Working                        | 87.7                 | 12.3       |         | 0.79 <sup>***</sup>  | (0.72-0.87) | 0.87 <sup>**</sup>   | (0.79-0.96) |
| <b>Smoking</b>                 |                      |            |         |                      |             |                      |             |
| No-smoker                      | 86.9                 | 13.1       | <0.001  | Ref.                 |             | Ref.                 |             |
| Smoker                         | 77.9                 | 21.9       |         | 1.88 <sup>***</sup>  | (1.49-2.36) | 1.61 <sup>***</sup>  | (1.25-2.08) |
| <b>Media exposure</b>          |                      |            |         |                      |             |                      |             |
| No                             | 86.6                 | 13.4       | 0.188   | Ref.                 |             |                      |             |
| Yes                            | 88.5                 | 11.5       |         | 0.84                 | (0.65-1.09) |                      |             |
| <b>Healthcare Barriers</b>     |                      |            |         |                      |             |                      |             |
| No barrier                     | 90.3                 | 9.7        | <0.001  | Ref.                 |             | Ref.                 |             |
| 1 or More Barriers             | 85.3                 | 14.7       |         | 1.61 <sup>***</sup>  | (1.44-1.79) | 1.20 <sup>**</sup>   | (1.07-1.35) |
| <b>Child Characteristics</b>   |                      |            |         |                      |             |                      |             |
| <b>Age(months)</b>             |                      |            |         |                      |             |                      |             |
| 0-5m                           | 87.4                 | 12.6       | <0.001  | Ref.                 |             | Ref.                 |             |
| 6-11m                          | 77.6                 | 22.4       |         | 2.00 <sup>***</sup>  | (1.64-2.45) | 2.05 <sup>***</sup>  | (1.66-2.52) |



|                                  |      |      |        |                     |             |                     |             |
|----------------------------------|------|------|--------|---------------------|-------------|---------------------|-------------|
| 12-23m                           | 80.8 | 19.2 |        | 1.64 <sup>***</sup> | (1.38-1.96) | 1.68 <sup>***</sup> | (1.39-2.04) |
| 24-35m                           | 86.8 | 13.2 |        | 1.06                | (0.89-1.26) | 1.04                | (0.85-1.26) |
| 36-47m                           | 91.3 | 8.7  |        | 0.65 <sup>***</sup> | (0.54-0.80) | 0.64 <sup>***</sup> | (0.52-0.79) |
| 48-60m                           | 93   | 7.0  |        | 0.52 <sup>***</sup> | (0.43-0.64) | 0.52 <sup>***</sup> | (0.42-0.66) |
| <b>Sex</b>                       |      |      |        |                     |             |                     |             |
| Boys                             | 85.7 | 14.3 | <0.001 | Ref.                |             | Ref.                |             |
| Girls                            | 87.7 | 12.3 |        | 0.84 <sup>***</sup> | (0.77-0.91) | 0.83 <sup>***</sup> | (0.76-0.91) |
| <b>Birth order</b>               |      |      |        |                     |             |                     |             |
| 1 child                          | 86.5 | 13.5 | 0.002  | Ref.                |             | Ref.                |             |
| 2-3 child                        | 87.5 | 12.6 |        | 0.92                | (0.84-1.01) | 1.0                 | (0.90-1.12) |
| 4-5 child                        | 85.9 | 14.1 |        | 1.05                | (0.92-1.21) | 1.02                | (0.86-1.20) |
| ≥6 child                         | 83.8 | 16.2 |        | 1.24 <sup>**</sup>  | (1.06-1.45) | 1.08                | (0.88-1.34) |
| <b>Twin</b>                      |      |      |        |                     |             |                     |             |
| Single                           | 86.7 | 13.3 | 0.649  | Ref.                |             |                     |             |
| Multiple                         | 85.4 | 14.6 |        | 1.11                | (0.70-1.75) |                     |             |
| <b>Still breastfeeding</b>       |      |      |        |                     |             |                     |             |
| No                               | 89.3 | 10.7 | <0.001 | Ref.                |             | Ref.                |             |
| Yes                              | 83.6 | 16.4 |        | 1.64 <sup>***</sup> | (1.50-1.79) | 0.89 <sup>*</sup>   | (0.80-0.99) |
| <b>Measles' vaccine</b>          |      |      |        |                     |             |                     |             |
| Not vaccinated                   | 86.7 | 13.3 | 0.898  | Ref.                |             |                     |             |
| Vaccinated                       | 86.7 | 13.3 |        | 1.01                | (0.92-1.10) |                     |             |
| <b>Vitamin A supplement</b>      |      |      |        |                     |             |                     |             |
| No                               | 87.2 | 12.8 | 0.055  | Ref.                |             | Ref.                |             |
| Yes                              | 86.2 | 13.8 |        | 1.09                | (1.00-1.20) | 1.1                 | (1.00-1.22) |
| <b>Household Characteristics</b> |      |      |        |                     |             |                     |             |
| <b>Wealth index</b>              |      |      |        |                     |             |                     |             |
| Poorest                          | 83.3 | 16.7 | <0.001 | Ref.                |             | Ref.                |             |
| Poorer                           | 85.4 | 14.6 |        | 0.85 <sup>*</sup>   | (0.75-0.97) | 0.9                 | (0.79-1.03) |
| Middle                           | 87.5 | 12.5 |        | 0.71 <sup>***</sup> | (0.62-0.82) | 0.77 <sup>***</sup> | (0.67-0.89) |
| Richer                           | 88.3 | 11.7 |        | 0.66 <sup>***</sup> | (0.57-0.77) | 0.79 <sup>**</sup>  | (0.66-0.93) |

|                           |      |      |        |                     |             |                     |             |
|---------------------------|------|------|--------|---------------------|-------------|---------------------|-------------|
| Richest                   | 90.2 | 9.8  |        | 0.54 <sup>***</sup> | (0.47-0.64) | 0.69 <sup>***</sup> | (0.55-0.86) |
| <b>Place of residence</b> |      |      |        |                     |             |                     |             |
| Urban                     | 91   | 9.0  | <0.001 | Ref.                |             | Ref.                |             |
| Rural                     | 85.5 | 14.5 |        | 1.71 <sup>***</sup> | (1.49-1.97) | 1.13                | (0.98-1.30) |
| <b>Region</b>             |      |      |        |                     |             |                     |             |
| Phnom Penh                | 89.1 | 10.9 | 0.002  | Ref.                |             | Ref.                |             |
| Plain                     | 86.1 | 13.9 |        | 1.33 <sup>*</sup>   | (1.06-1.67) | 0.79 <sup>*</sup>   | (0.62-0.99) |
| Tonle Sap                 | 86   | 14.0 |        | 1.34 <sup>**</sup>  | (1.07-1.67) | 0.75 <sup>*</sup>   | (0.60-0.94) |
| Coastal                   | 89.8 | 10.1 |        | 0.93                | (0.72-1.19) | 0.53 <sup>***</sup> | (0.41-0.69) |
| Mountain                  | 86.8 | 13.2 |        | 1.25                | (0.99-1.57) | 0.67 <sup>**</sup>  | (0.53-0.85) |
| <b>Drinking water</b>     |      |      |        |                     |             |                     |             |
| Improved                  | 87.3 | 12.7 | 0.018  | Ref.                |             | Ref.                |             |
| Unimproved                | 85.9 | 14.1 |        | 1.13 <sup>*</sup>   | (1.02-1.24) | 1.01                | (0.91-1.12) |
| <b>Toilet facility</b>    |      |      |        |                     |             |                     |             |
| Improved                  | 90.4 | 9.6  | <0.001 | Ref.                |             | Ref.                |             |
| Non-Improved              | 83.1 | 16.9 |        | 1.93 <sup>***</sup> | (1.74-2.14) | 1.07                | (0.93-1.23) |
| <b>Survey years</b>       |      |      |        |                     |             |                     |             |
| 2005                      | 80.3 | 19.7 | <0.001 | Ref.                |             | Ref.                |             |
| 2010                      | 85.0 | 15.0 |        | 0.72 <sup>***</sup> | (0.63-0.82) | 0.74 <sup>***</sup> | (0.64-0.85) |
| 2014                      | 87.1 | 12.9 |        | 0.60 <sup>***</sup> | (0.53-0.69) | 0.62 <sup>***</sup> | (0.54-0.72) |
| 2022                      | 93.8 | 6.2  |        | 0.27 <sup>***</sup> | (0.23-0.31) | 0.32 <sup>***</sup> | (0.26-0.38) |

306 †  $p < 0.05$ , ††  $p < 0.01$ , †††  $p < 0.001$

To evaluate the potential effect modification of statistically significant associations by time and space, interaction models were estimated for each of the statistically significant factors from the adjusted analysis presented in **Table 3**. These factors were separately interacted with region and year. Almost all of these analyses resulted in interaction terms that were not statistically significant, indicating that the corresponding factors were associated with child diarrhea regardless of the region of Cambodia where a child lived or the year in which the data were collected. The one exception was the interaction between child age by residence and survey years, which resulted in a statistically significant interaction that was visualized with predicted probabilities (see **Fig 5**). The predicted probabilities indicate that children with increased age had a significantly lower probability of diarrhea in urban areas across Cambodia's survey years than children living in rural areas.

**Fig 5.** Predicted probability of child diarrhea in Cambodia by residences and survey years (N=29,742)

## Discussion

We have described the temporal and geospatial prevalence of diarrhea among children in Cambodia between 2005 and 2022, noting a significant decrease from 19.7% in 2005 to 15.0% in 2010 to 12.9% in 2014 and 6.2% in 2022. This reduction in diarrhea burden corresponds with global efforts to reduce under-five mortality, and likely contributed to Cambodia's achievement of Millennium Development Goal 4 (MDG-4) to reduce child mortality [6, 17, 18, 19]. This might be attributed to the efforts and initiative of the Royal Government of Cambodia (RGC), which has strengthened health facilities across the country, particularly in rural areas, improved the medical infrastructure, provided essential medical equipment and supplies, and improved safe drinking water and sanitation in rural area [6]. Recently, the RGC has prioritized child health and nutrition, closely monitored by the Prime Minister to ensure policy implementation and achieve Sustainable Development Goals 3 (SDGs-3) [20-22]. Cambodia has set ambitious goals within SDG-3, specifically aiming to reduce neonatal mortality to less than 12 per 1,000 live births and under-five mortality to less than 25 per 1,000 live births by 2030. These goals require continued focus on preventable childhood deaths, including diarrhea.

Our study found several factors associated with increased odds of having diarrhea among children aged 0–59 months in Cambodia. These include children born to mothers who smoke, mothers with limited access to healthcare services, and children aged 6–23 months. However, children were less likely to have diarrhea if their mothers were 25 or older, had at least a secondary education, were employed, or if the child was female, aged 36–60 months, lived in the richest wealth quintile, resided in a coastal region, or were surveyed in later years.

Children of mothers aged 25–34 years and 35–49 years have shown less occurrence of childhood diarrhea than young mothers. This is consistent with previous studies in Cambodia and India [9,16]. Likely, lower knowledge and experience of childcare and feeding among younger mothers can be a plausible causal explanation [9,17-19]. The odds of having diarrhea are lower among the children of working mothers, and similar findings have been identified in some recent studies in Cambodia, India, and Senegal [9,16,20]. Several studies document that the mother's employment status may have an education, which will improve a child's quality of living

environment standards as well as improve hygienic practice, safe drinking water, and sanitation in the home during feeding and childcare [9,14,21,22]. Children of mothers completed secondary or higher education were found to be less likely than children whose mothers had no education to experience diarrhea. This is in line with findings from Cambodia [14,21]. This finding might be explained by the fact that highly educated mothers might have access to books and more education education programs that help to better knowledge and experience of childcare and feeding children [14,21].

Children from wealthier households were less likely to have diarrhea compared to those from poorer households, consistent with studies in Bangladesh, India, and Cambodia [15, 17, 22, 24]. This likely reflects increased access to nutrition and healthcare for children in wealthier households [15, 17, 22]. Higher income allows families to provide a more diverse diet, improved quality of care, and access to health services [25]. In this study, the age of the children significantly affected their risk of diarrhea. Children aged 36–47 months (AOR = 0.64; 95% CI: 0.52–0.79) and 48–60 months (AOR = 0.52; 95% CI: 0.42–0.66) had a lower odds ratio of having diarrhea compared to those aged 0–5 months. This finding aligns with similar studies [17, 22]. However, children aged 6–11 months (AOR = 2.05; 95% CI: 1.66–2.52) and 12–23 months (AOR = 1.68; 95% CI: 1.39–2.04) were more likely to have diarrhea compared to infants under five months. This aligns with research conducted in Northwest Ethiopia, India, and Cambodia [15, 17, 22, 23] and might be due to the developing immune system throughout childhood [22]. Females were less likely to have diarrhea than males, which may reflect a natural predisposition of males to develop diarrhea more frequently than females [8].

Children of smoking mothers were 1.61 times more likely to have diarrhea compared to children of non-smoking mothers. A narrative review focused on smoking increases the risk of infectious diseases, which found that investigators found that smoking was the leading risk factor in a reduced immune response [23]. Children of mothers having a problem accessing healthcare services were 1.20 times more likely to have diarrhea compared to children of mothers not having a problem. This aligns with findings from 31 countries in sub-Saharan Africa [24]. For women, access to medical care is one buffer against poor health. However, disadvantaged women experience limited access to care and are more likely to have an unplanned pregnancy,

partly reflecting inadequate preconception care and family planning. They are also more likely to start prenatal care later than advantaged peers, deliver in hospitals with lower quality-of-care indicators, and are less likely to know about childcare [24]. Lastly, children living in rural areas had AOR=1.13 times more likely to have diarrhea than in urban areas. This result was in line with the study conducted in India and Cambodia [9,16]. This could be due to limited access to healthcare and sanitation facilities in rural areas [14,21,22]. Thus, compared to children living in households with unimproved drinking water, children from households with unimproved toilets were found not significantly associated with diarrhea. Inconsistent with other studies, Improved sanitation facilities were found in a supporting multicounty WASH-intervention study to reduce the risk of children from infection disease [25,26].

### **Limitation**

This study used pooled data from Cambodia Demographic and Health surveys from 2005, 2010, 2014, and 2022. This enabled us to describe the temporal and geographical trends in diarrhea among children aged 0–59 months using nationally representative data [14,15]. Likewise, we were able to examine factors associated with diarrhea among children throughout Cambodia. We acknowledge that the results from this study may reflect the present prevalence of diarrhea among children in the country by comparing the associated factors with diarrhea among children to another DHS survey. It is hoped that the evidence will help the Cambodian Ministry of Health’s Child Health program, as well as health promotion and social determinants, to plan interventions to reduce child morbidity and mortality due to diarrhea. However, CDHS collected data as a cross-sectional study, so examining causality in these relationships was impossible. Also, the outcome variable was collected from self-reporting from mothers or caregivers to define the presence of diarrhea among eligible children in the past two weeks before data collection, making our analysis prone to recall bias. However, this recall bias appears non-differential since the DHS survey uses the standard questionnaire recommended by UNICEF/WHO [27]. As a secondary data analysis, several known etiologies of diarrhea, such as parasites, viruses, bacteria, and common factors for diarrhea. These included children's malnutrition, history of illness, antibiotic prescription, type of roofing material, household types

of cooking, season effect, and protective vaccination against diarrhea, which were not included in this study due to data limitations.

## **Conclusion**

Our findings suggest that the relatively high prevalence of diarrhea among children aged 0–59 months in Cambodia declined slightly over the 20 years between 2005 and 2022. Diarrhea among children continues to be a significant public health concern in Cambodia. This study indicated that the factors associated with increased odds of having diarrhea among children aged 0–59 months in Cambodia, including children of smoking mothers, mothers having a problem accessing healthcare services, children aged 6–23 months, and children living in rural areas. However, children born to mothers aged 25 or above, mothers who completed at least secondary education, maternal employment, females, children aged 36–60 months, children living in the richest wealth quintiles, coastal regions, and survey years were less likely to have diarrhea. Public health practitioners and policymakers should consider demographic groups represented by these characteristics to produce better-targeted interventions to address diarrhea among children in Cambodia.

## **Funding Statement**

The authors received no specific funding for this work.

## **Competing Interests**

The authors have declared that no competing interests exist.

## **Acknowledgments**

The authors would like to thank DHS-ICF, who approved the data used for this paper.

## **Data Availability Statement**

Our study used 2005, 2010, 2014, and 2021-22 Cambodia Demographic and Health Survey (CDHS) datasets. The DHS data are publicly available from the website at (URL: <https://www.dhsprogram.com/data/available-datasets.cfm>).

## Abbreviations

ACS; American Cancer Society, AOR; adjusted odds ratio, CDHS; Cambodia Demographic Health Survey, EA; enumeration areas, PPS; probability proportional to size

## References

1. WHO. World Health Organization. Diarrhoeal disease; Key facts 2024 [7 March 2024]. Available from: <https://www.who.int/news-room/fact-sheets/detail/diarrhoeal-disease>.
2. WHO. Global Health Estimates 2020: Disease burden by Cause, Age, Sex, by Country and by Region, 2000–2019. Geneva, Switzerland: World Health Organization, 2020.
3. National Institute of Public Health, National Institute of Statistics, and ORC Macro. Cambodia Demographic and Health Survey 2005. Phnom Penh, Cambodia and Calverton, Maryland, USA: National Institute of Public Health, National Institute of Statistics and ORC Macro. 2005. Available online: <https://dhsprogram.com/pubs/pdf/FR185/FR185%5BApril-27-2011%5D.pdf>. 2006.
4. National Institute of Statistics, Directorate General for Health, and ICF International. Cambodia Demographic and Health Survey 2014. Phnom Penh, Cambodia, and Rockville, Maryland, USA: National Institute of Statistics, Directorate General for Health, and ICF International. Available online: <https://dhsprogram.com/pubs/pdf/fr312/fr312.pdf>. 2015.
5. National Institute of Statistics, Directorate General for Health, and ICF Macro. Cambodia Demographic and Health Survey 2010. Phnom Penh, Cambodia and Calverton, Maryland, USA: National Institute of Statistics, Directorate General for Health, and ICF Macro. 2010. Available online: <https://dhsprogram.com/pubs/pdf/Fr249/Fr249.pdf>. 2011.
6. National Institute of Statistics PP, Cambodia, Ministry of Health Phnom Penh, Cambodia, The DHS Program, ICF, Rockville, Maryland, USA. Cambodia Demographic and Health Survey 2021–22. Phnom Penh, Cambodia, and Rockville, Maryland, USA: NIS, MoH, and ICF. 2022. Available from: <https://dhsprogram.com/pubs/pdf/FR377/FR377.pdf>.
7. Sharrow D, Hug L, You D, Alkema L, Black R, Cousens S, et al. Global, regional, and national trends in under-5 mortality between 1990 and 2019 with scenario-based projections until 2030: a systematic analysis by the UN Inter-agency Group for Child Mortality Estimation. *Lancet Glob Health*. 2022;10(2):e195-e206. doi: 10.1016/s2214-109x(21)00515-5. PubMed PMID: 35063111; PubMed Central PMCID: PMC8789561.
8. Arifin H, Rakhmawati W, Kurniawati Y, Pradipta RO, Efendi F, Gusmaniarti G, et al. Prevalence and determinants of diarrhea among under-five children in five Southeast Asian countries: Evidence from the demographic health survey. *Journal of Pediatric Nursing*. 2022.
9. Pisey V, Banchonhattakit P, Laohasiriwong W. The association of socio-demographic and environmental factors on childhood diarrhea in Cambodia. *F1000Research*. 2020;9.



10. Sarker AR, Sultana M, Mahumud RA, Sheikh N, Van Der Meer R, Morton A. Prevalence and health care-seeking behavior for childhood diarrheal disease in Bangladesh. *Global pediatric health*. 2016;3:2333794X16680901.
11. STATA. StataCorp. 2023. Stata Statistical Software: Release 18. College Station, TX: StataCorp LLC. 2023.
12. Desktop A. Release 10.3.(2020). ESRI (Environmental Systems Research Institute), Redlands, CA.
13. Cunningham SA, J. Muir, J. A. "Data Cleaning". *The Cambridge Handbook of Research Methods and Statistics for the Social and Behavioral Sciences: Volume 1: Building a Program of Research*. Cambridge Handbooks in Psychology. Cambridge: Cambridge University Press; 2023. p. 443–67. 2023. doi: <https://doi.org/10.1017/9781009010054.022>.
14. Um S, Cope MR, Muir JA. Child anemia in Cambodia: A descriptive analysis of temporal and geospatial trends and logistic regression-based examination of factors associated with anemia in children. *PLOS Glob Public Health*. 2023;3(9):e0002082. Epub 20230915. doi: 10.1371/journal.pgph.0002082. PubMed PMID: 37713392; PubMed Central PMCID: PMCPCMC10503718.
15. Um S, Sopheab H, Yom A, Muir JA. Anemia among pregnant women in Cambodia: A descriptive analysis of temporal and geospatial trends and logistic regression-based examination of factors associated with anemia in pregnant women. *PLoS One*. 2023;18(12):e0274925. Epub 20231207. doi: 10.1371/journal.pone.0274925. PubMed PMID: 38060474; PubMed Central PMCID: PMCPCMC10703242.
16. Ghosh K, Chakraborty AS, Mog M. Prevalence of diarrhoea among under five children in India and its contextual determinants: A geo-spatial analysis. *Clinical Epidemiology and Global Health*. 2021;12:100813.
17. Nilima n, Kamath A, Shetty K, Unnikrishnan B, Kaushik S, Rai SN. Prevalence, patterns, and predictors of diarrhea: a spatial-temporal comprehensive evaluation in India. *BMC public health*. 2018;18:1-10.
18. Edwin P, Azage M. Geographical variations and factors associated with childhood diarrhea in Tanzania: a national population based survey 2015-16. *Ethiopian journal of health sciences*. 2019;29(4).
19. Ghasemi AA, Talebian A, Masoudi Alavi N, Moosavi G. Knowledge of mothers in management of diarrhea in under-five children, in kashan, iran. *Nurs midwifery stud*. 2013;1(3):158-62.
20. Thiam S, Diène AN, Fuhrmann S, Winkler MS, Sy I, Ndione JA, et al. Prevalence of diarrhoea and risk factors among children under five years old in Mbour, Senegal: a cross-sectional study. *Infect Dis Poverty*. 2017;6(1):109. Epub 20170706. doi: 10.1186/s40249-017-0323-1. PubMed PMID: 28679422; PubMed Central PMCID: PMCPCMC5499039.
21. Um S, Vang D, Pin P, Chau D. Trends and determinants of acute respiratory infection symptoms among under-five children in Cambodia: Analysis of 2000 to 2014 Cambodia demographic and health surveys. *PLOS Glob Public Health*. 2023;3(5):e0001440. Epub 20230503. doi: 10.1371/journal.pgph.0001440. PubMed PMID: 37134089; PubMed Central PMCID: PMCPCMC10155954.
22. Vong P, Banchohattakit P, Sim S, Pall C, Dewey RS. Unhygienic stool-disposal practices among mothers of children under five in Cambodia: Evidence from a demographic and health survey. *PloS one*. 2021;16(7):e0249006. Epub 20210701. doi: 10.1371/journal.pone.0249006. PubMed PMID: 34197455; PubMed Central PMCID: PMCPCMC8248716.
23. Jiang C, Chen Q, Xie M. Smoking increases the risk of infectious diseases: A narrative review. *Tob Induc Dis*. 2020;18:60. Epub 20200714. doi: 10.18332/tid/123845. PubMed PMID: 32765200; PubMed Central PMCID: PMCPCMC7398598.
24. Adedokun ST, Yaya S. Factors influencing mothers' health care seeking behaviour for their children: evidence from 31 countries in sub-Saharan Africa. *BMC Health Serv Res*. 2020;20(1):842. Epub 20200907. doi: 10.1186/s12913-020-05683-8. PubMed PMID: 32894107; PubMed Central PMCID: PMCPCMC7487813.

25. Naz L, Ghimire U. Unimproved water, sanitation, and hygiene (WASH) and common childhood illness in Myanmar: evidence from a nationally representative survey. 2020.
26. Gera T, Shah D, Sachdev HS. Impact of Water, Sanitation and Hygiene Interventions on Growth, Non-diarrheal Morbidity and Mortality in Children Residing in Low- and Middle-income Countries: A Systematic Review. *Indian Pediatr.* 2018;55(5):381-93. Epub 20180209. PubMed PMID: 29428924.
27. Rego R, Watson S, Alam MAU, Abdullah SA, Yunus M, Alam IT, et al. A comparison of traditional diarrhoea measurement methods with microbiological and biochemical indicators: A cross-sectional observational study in the Cox's Bazar displaced persons camp. *EClinicalMedicine.* 2021;42:101205. Epub 20211120. doi: 10.1016/j.eclinm.2021.101205. PubMed PMID: 34849477; PubMed Central PMCID: PMC8608865.

## Supporting information

**S1 Table.** Results of checking multicollinearity using Variance Inflation Factor

| <b>Variable</b>         | <b>VIF</b> |
|-------------------------|------------|
| Wealth quintile         | 2.16       |
| Type of toilet facility | 2.11       |
| Mother age              | 1.50       |
| Survey years            | 1.47       |
| Mother education        | 1.45       |
| Place of residence      | 1.32       |
| Geographical region     | 1.24       |
| Smoking                 | 1.10       |
| Maternal empyloment     | 1.02       |
| Sex of child            | 1.00       |
| Mean VIF                | 1.42       |



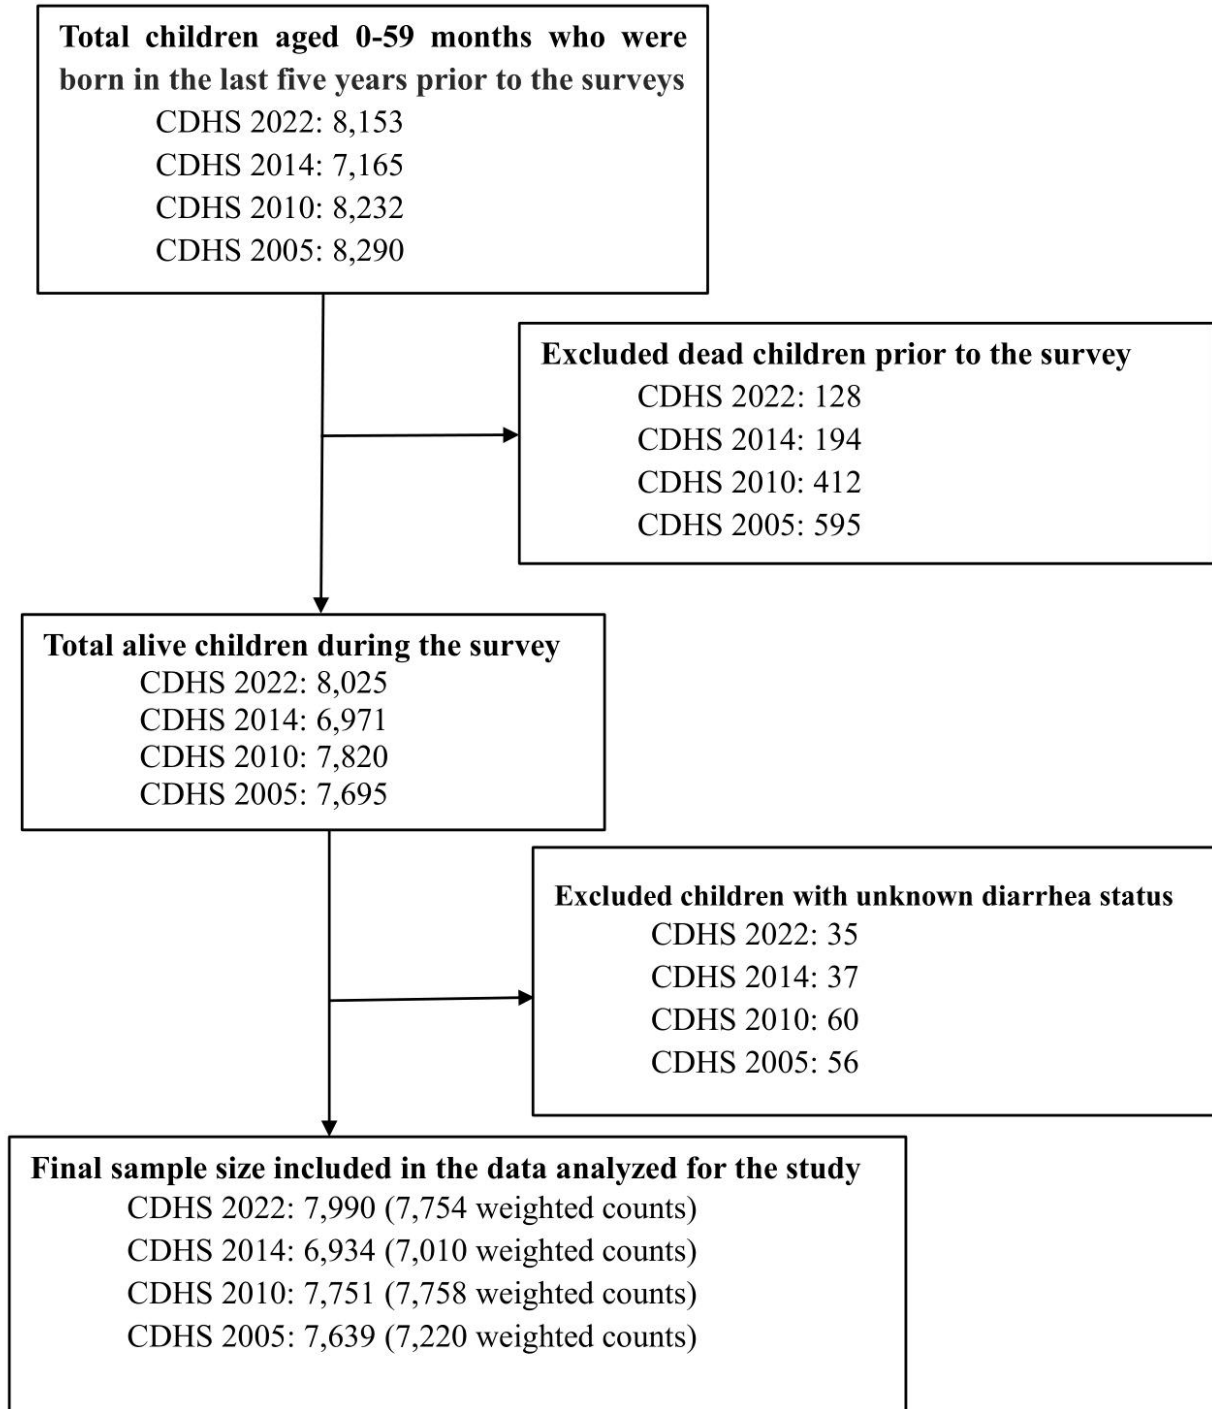

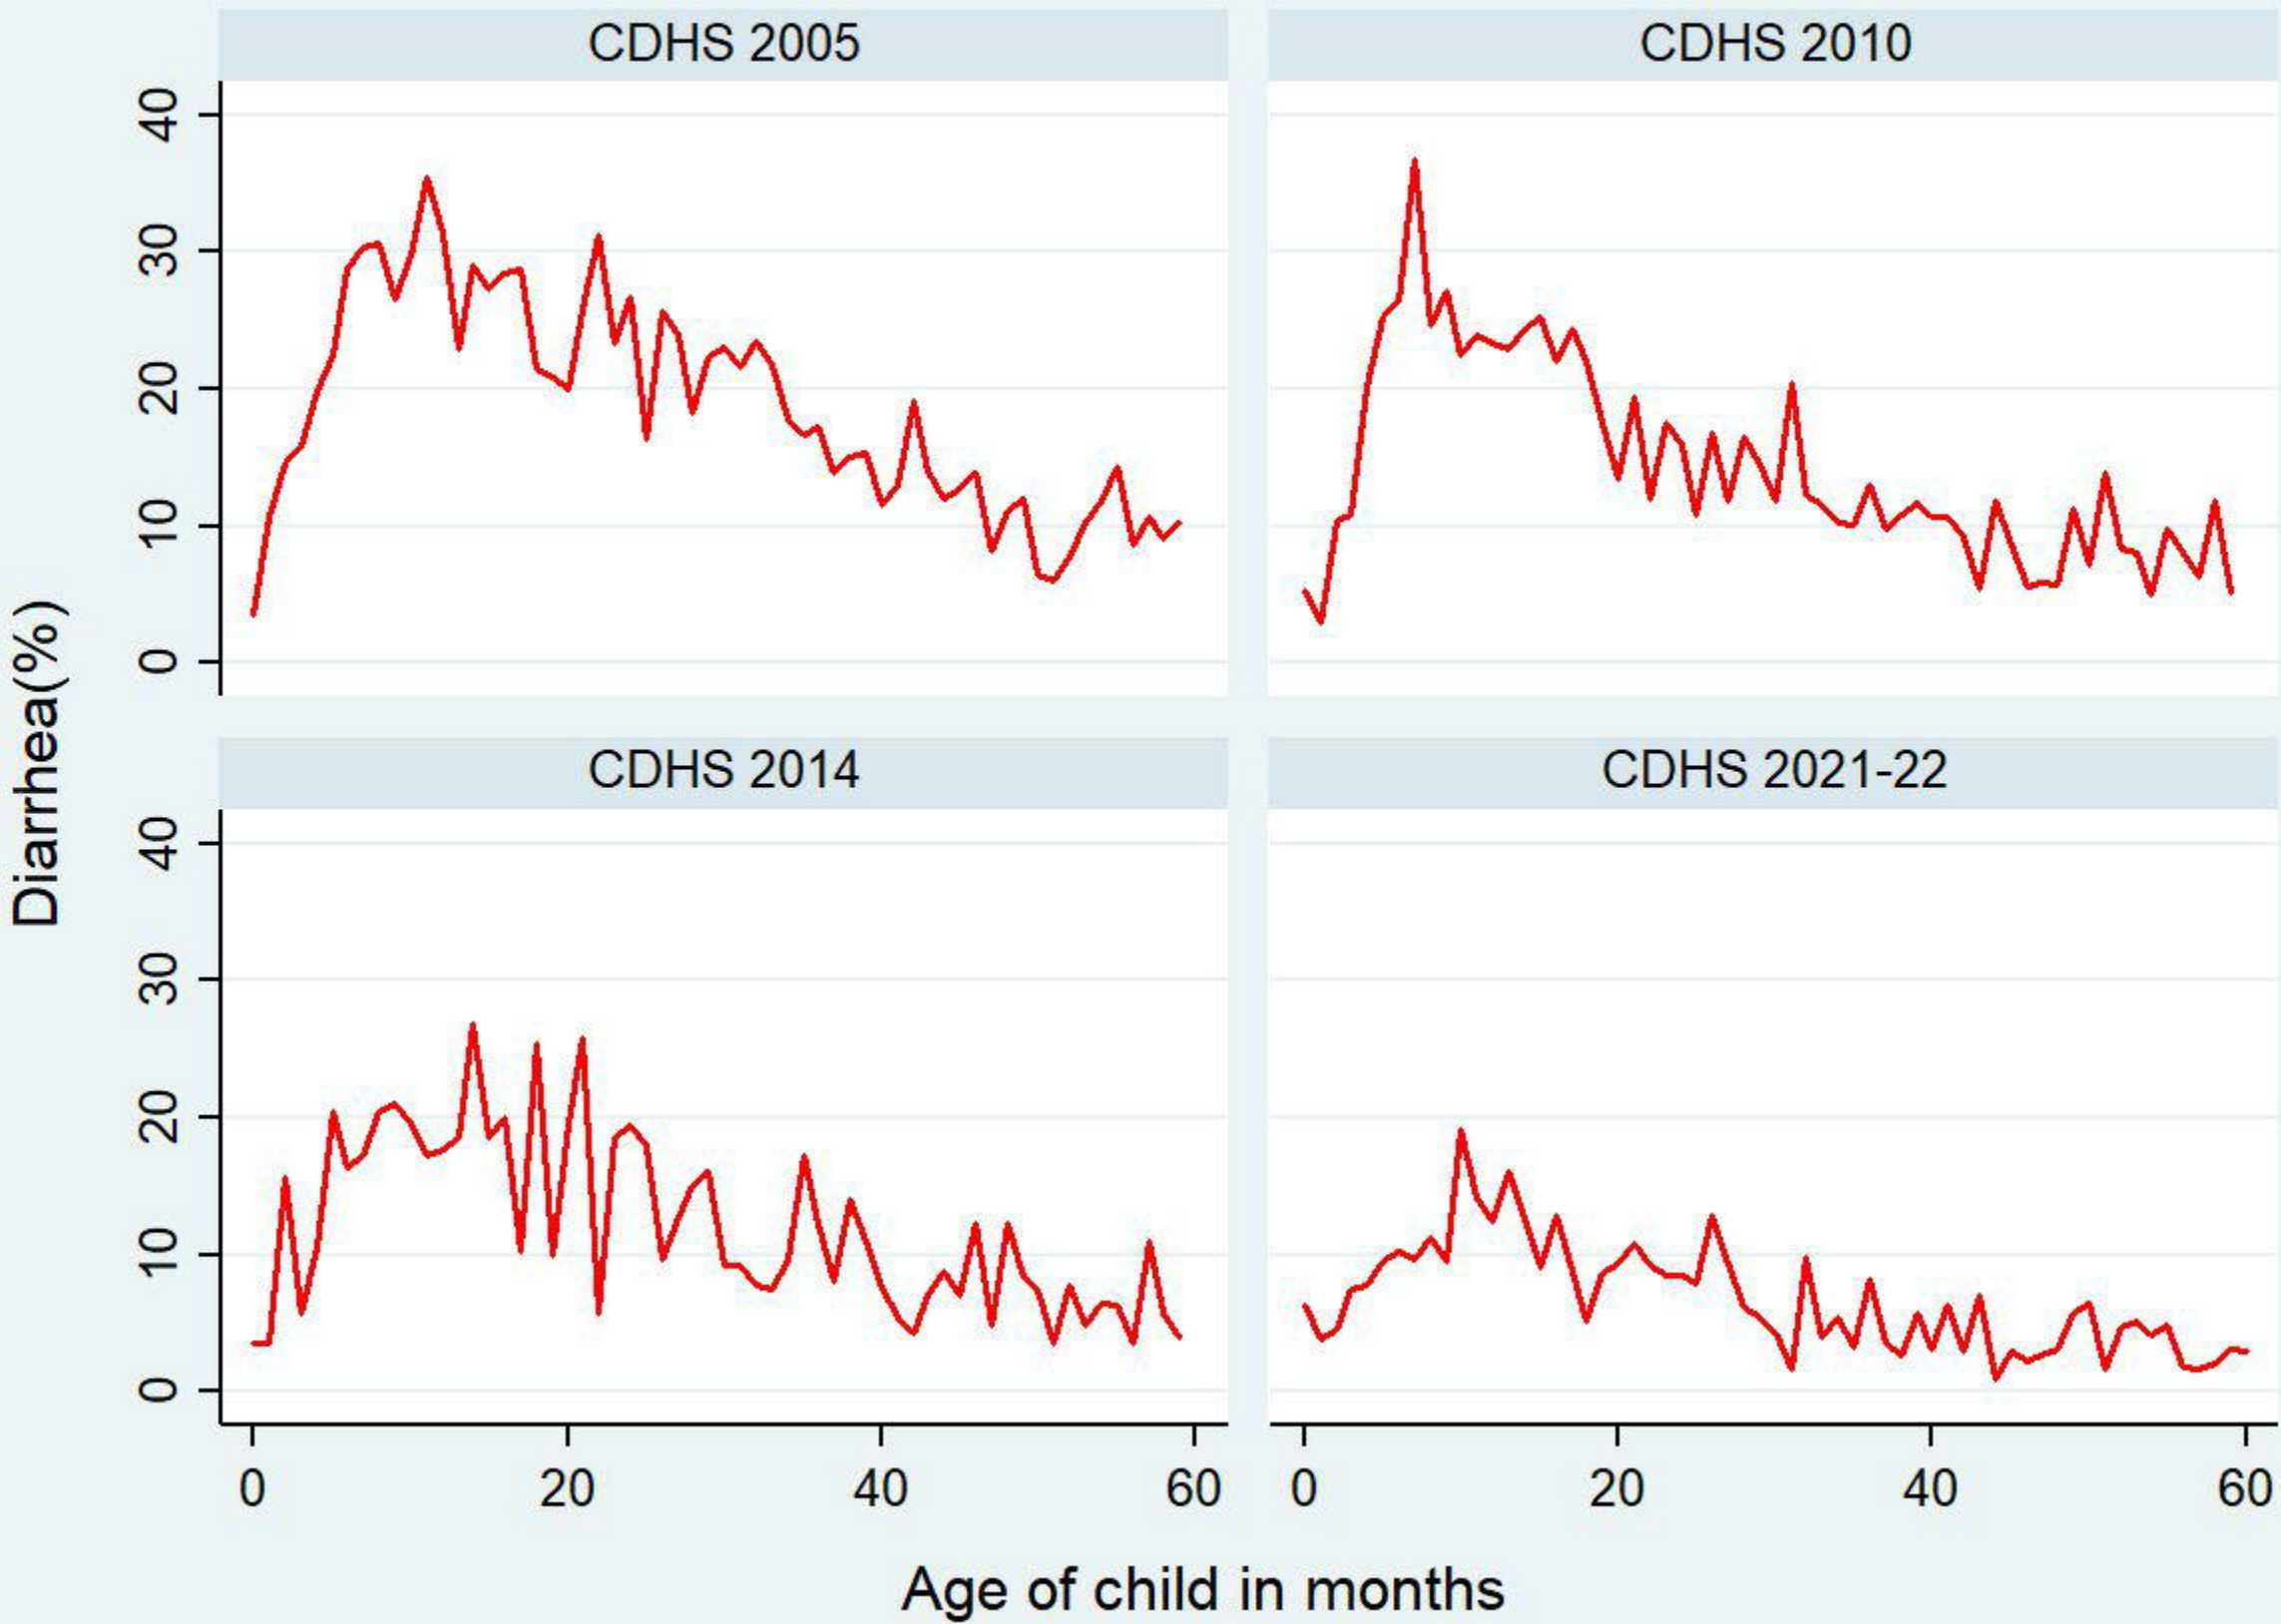

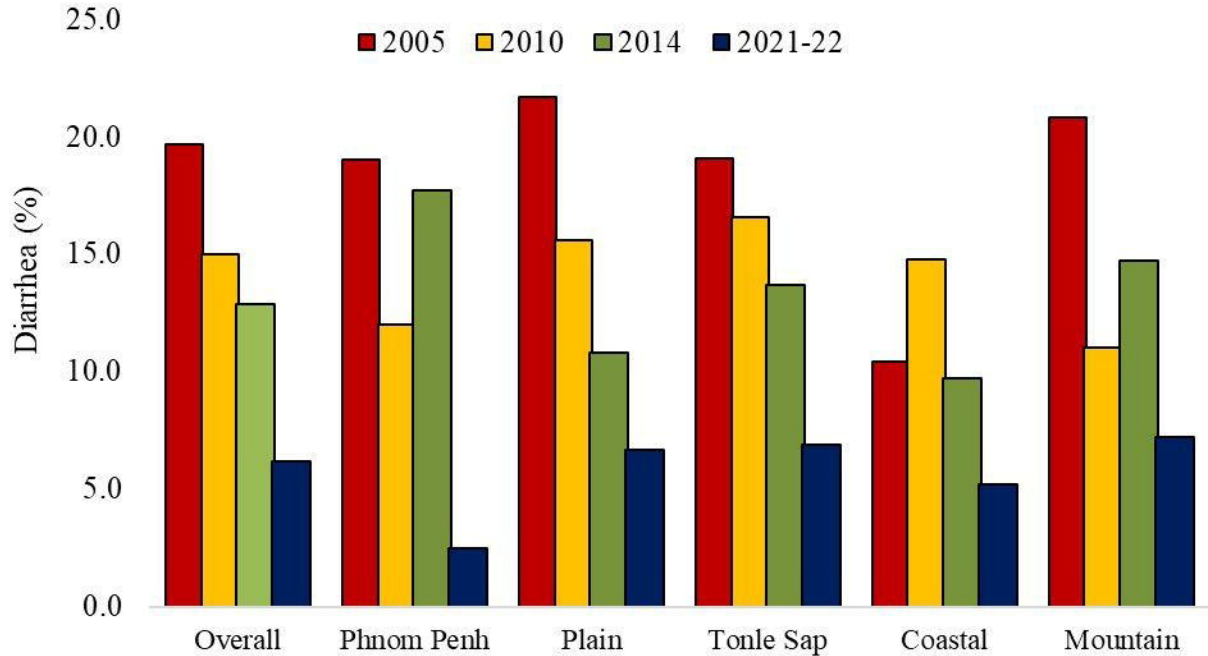

CDHS 2005

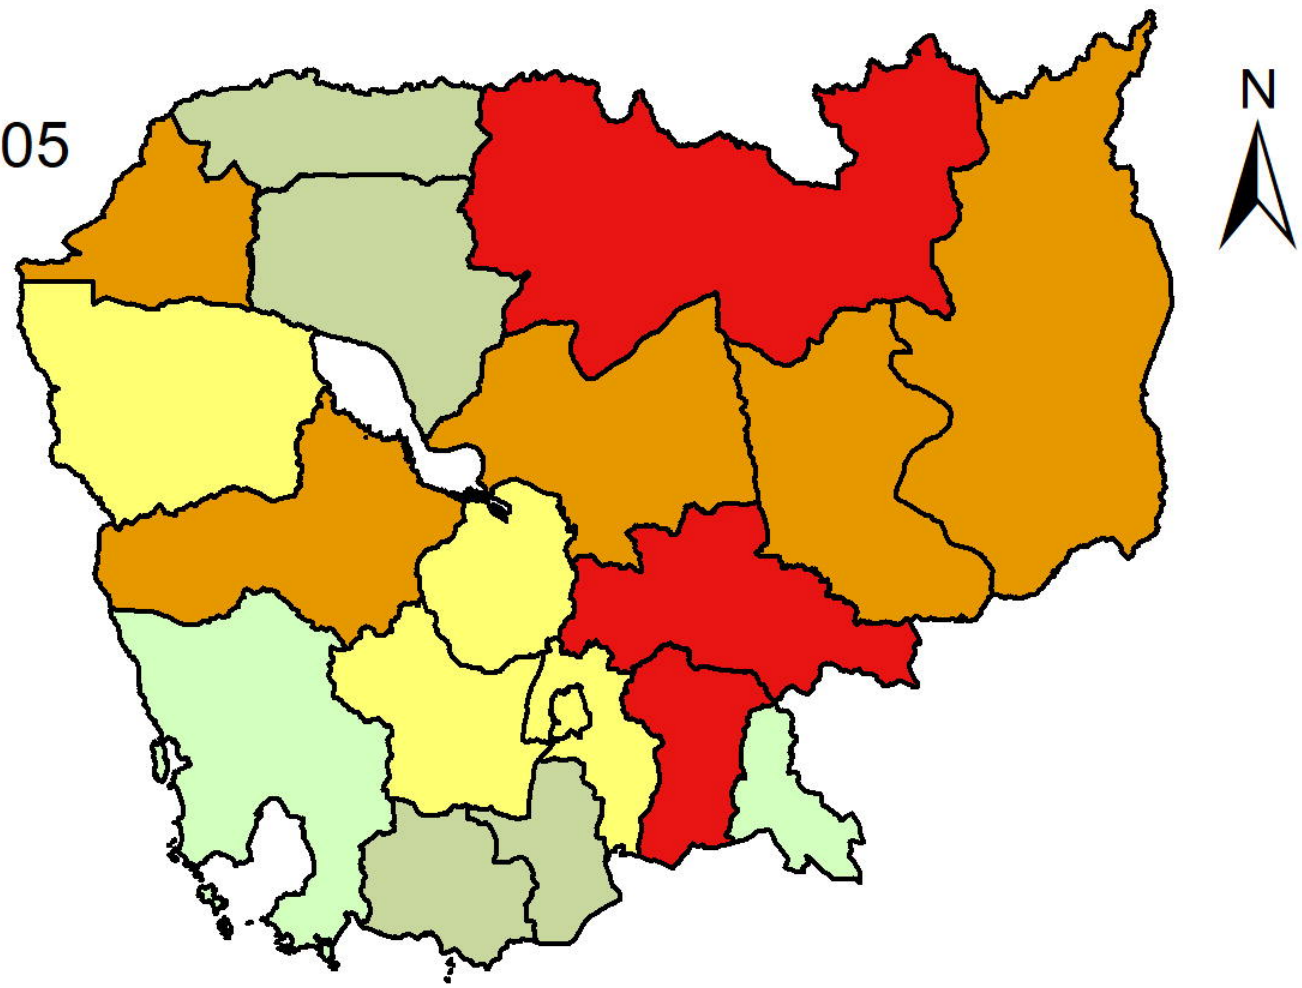

CDHS 2010

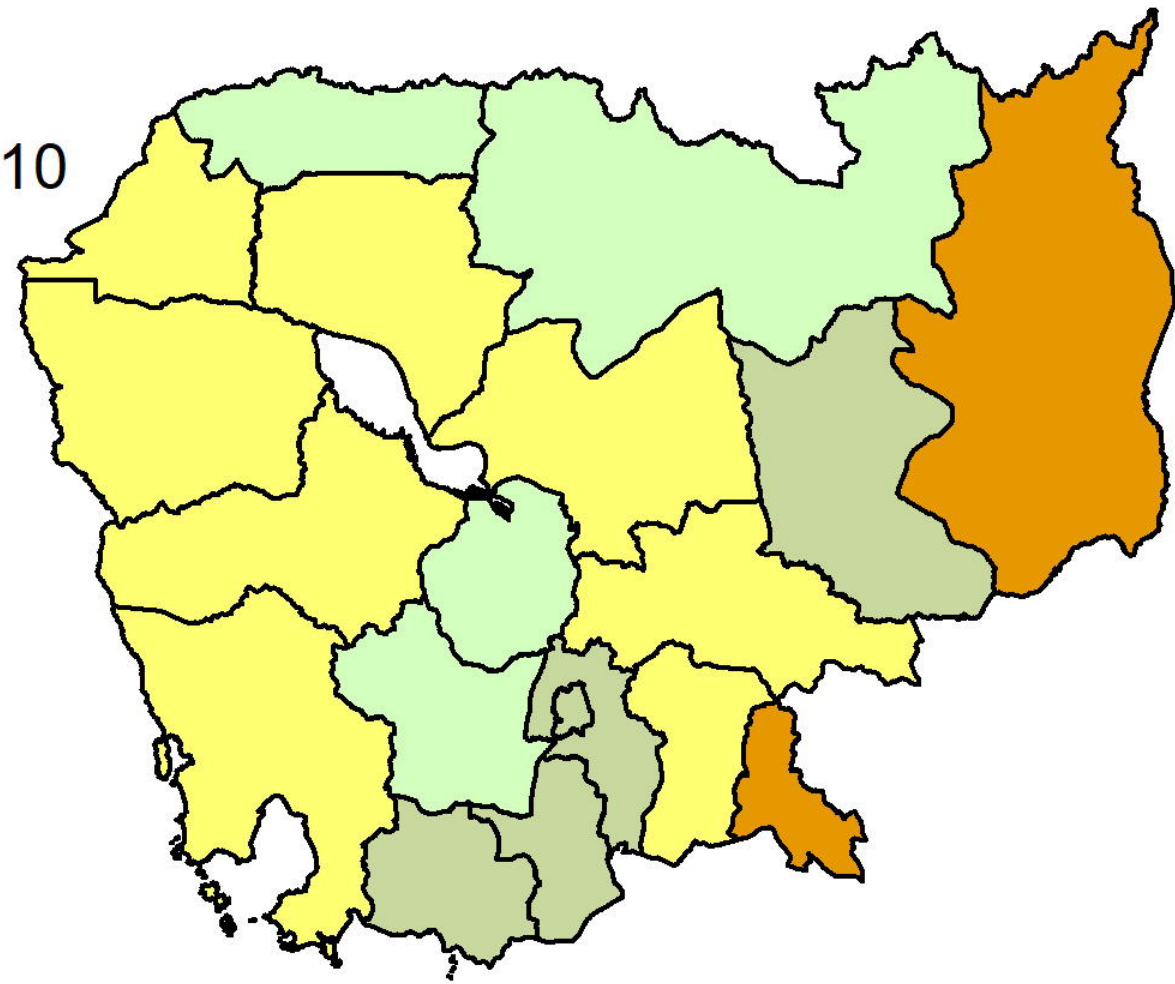

CDHS 2014

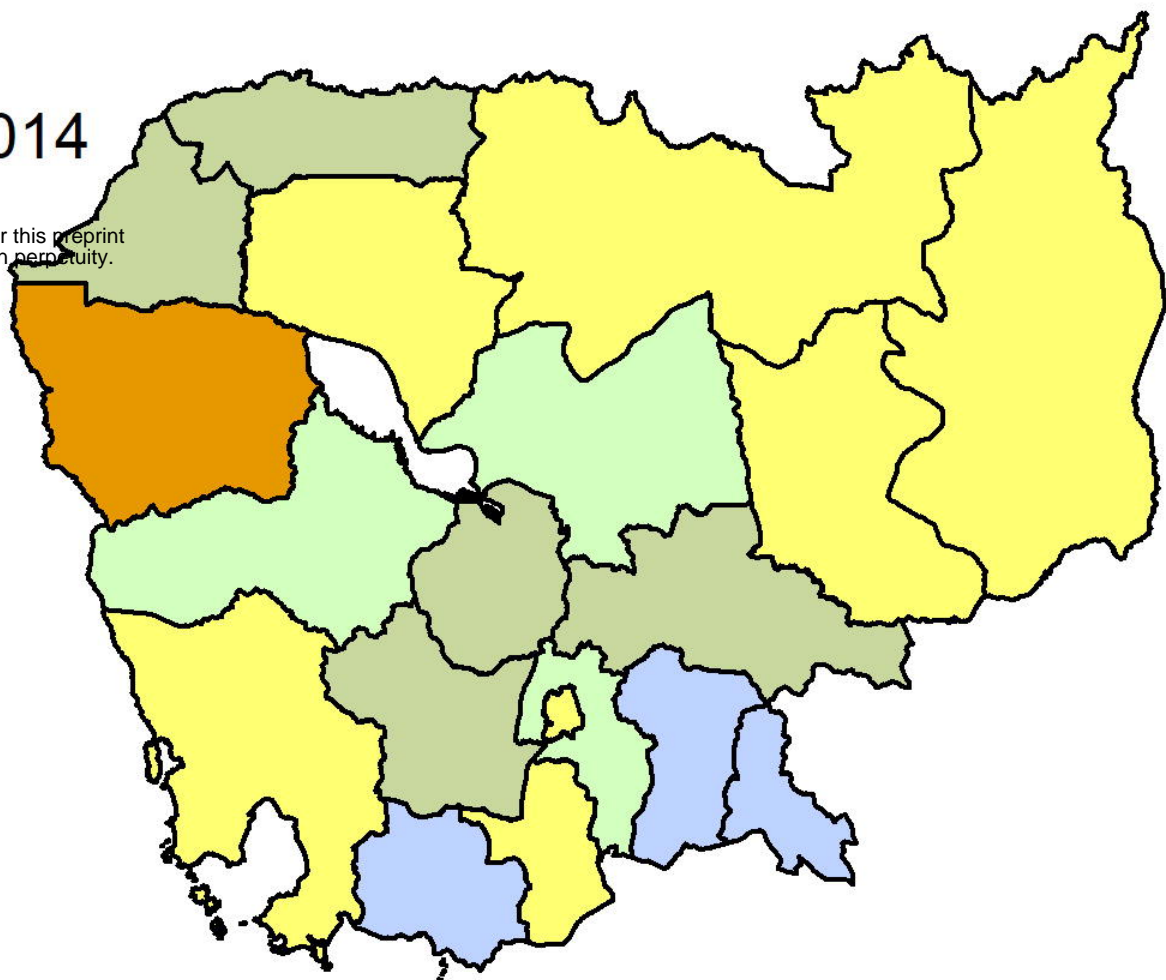

CDHS 2022

**Diarrhea (%)**

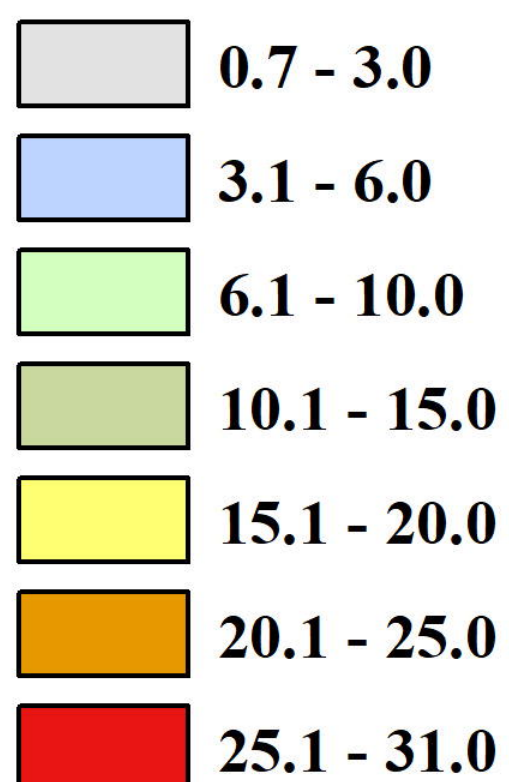

0 55 110 220 330 Kilometers



# Predicted probability of child diarrhea by residence and survey years

medRxiv preprint doi: <https://doi.org/10.1101/2024.05.08.24307034>; this version posted May 8, 2024. The copyright holder for this preprint (which was not certified by peer review) is the author/funder, who has granted medRxiv a license to display the preprint in perpetuity. It is made available under a [CC-BY 4.0 International license](https://creativecommons.org/licenses/by/4.0/).

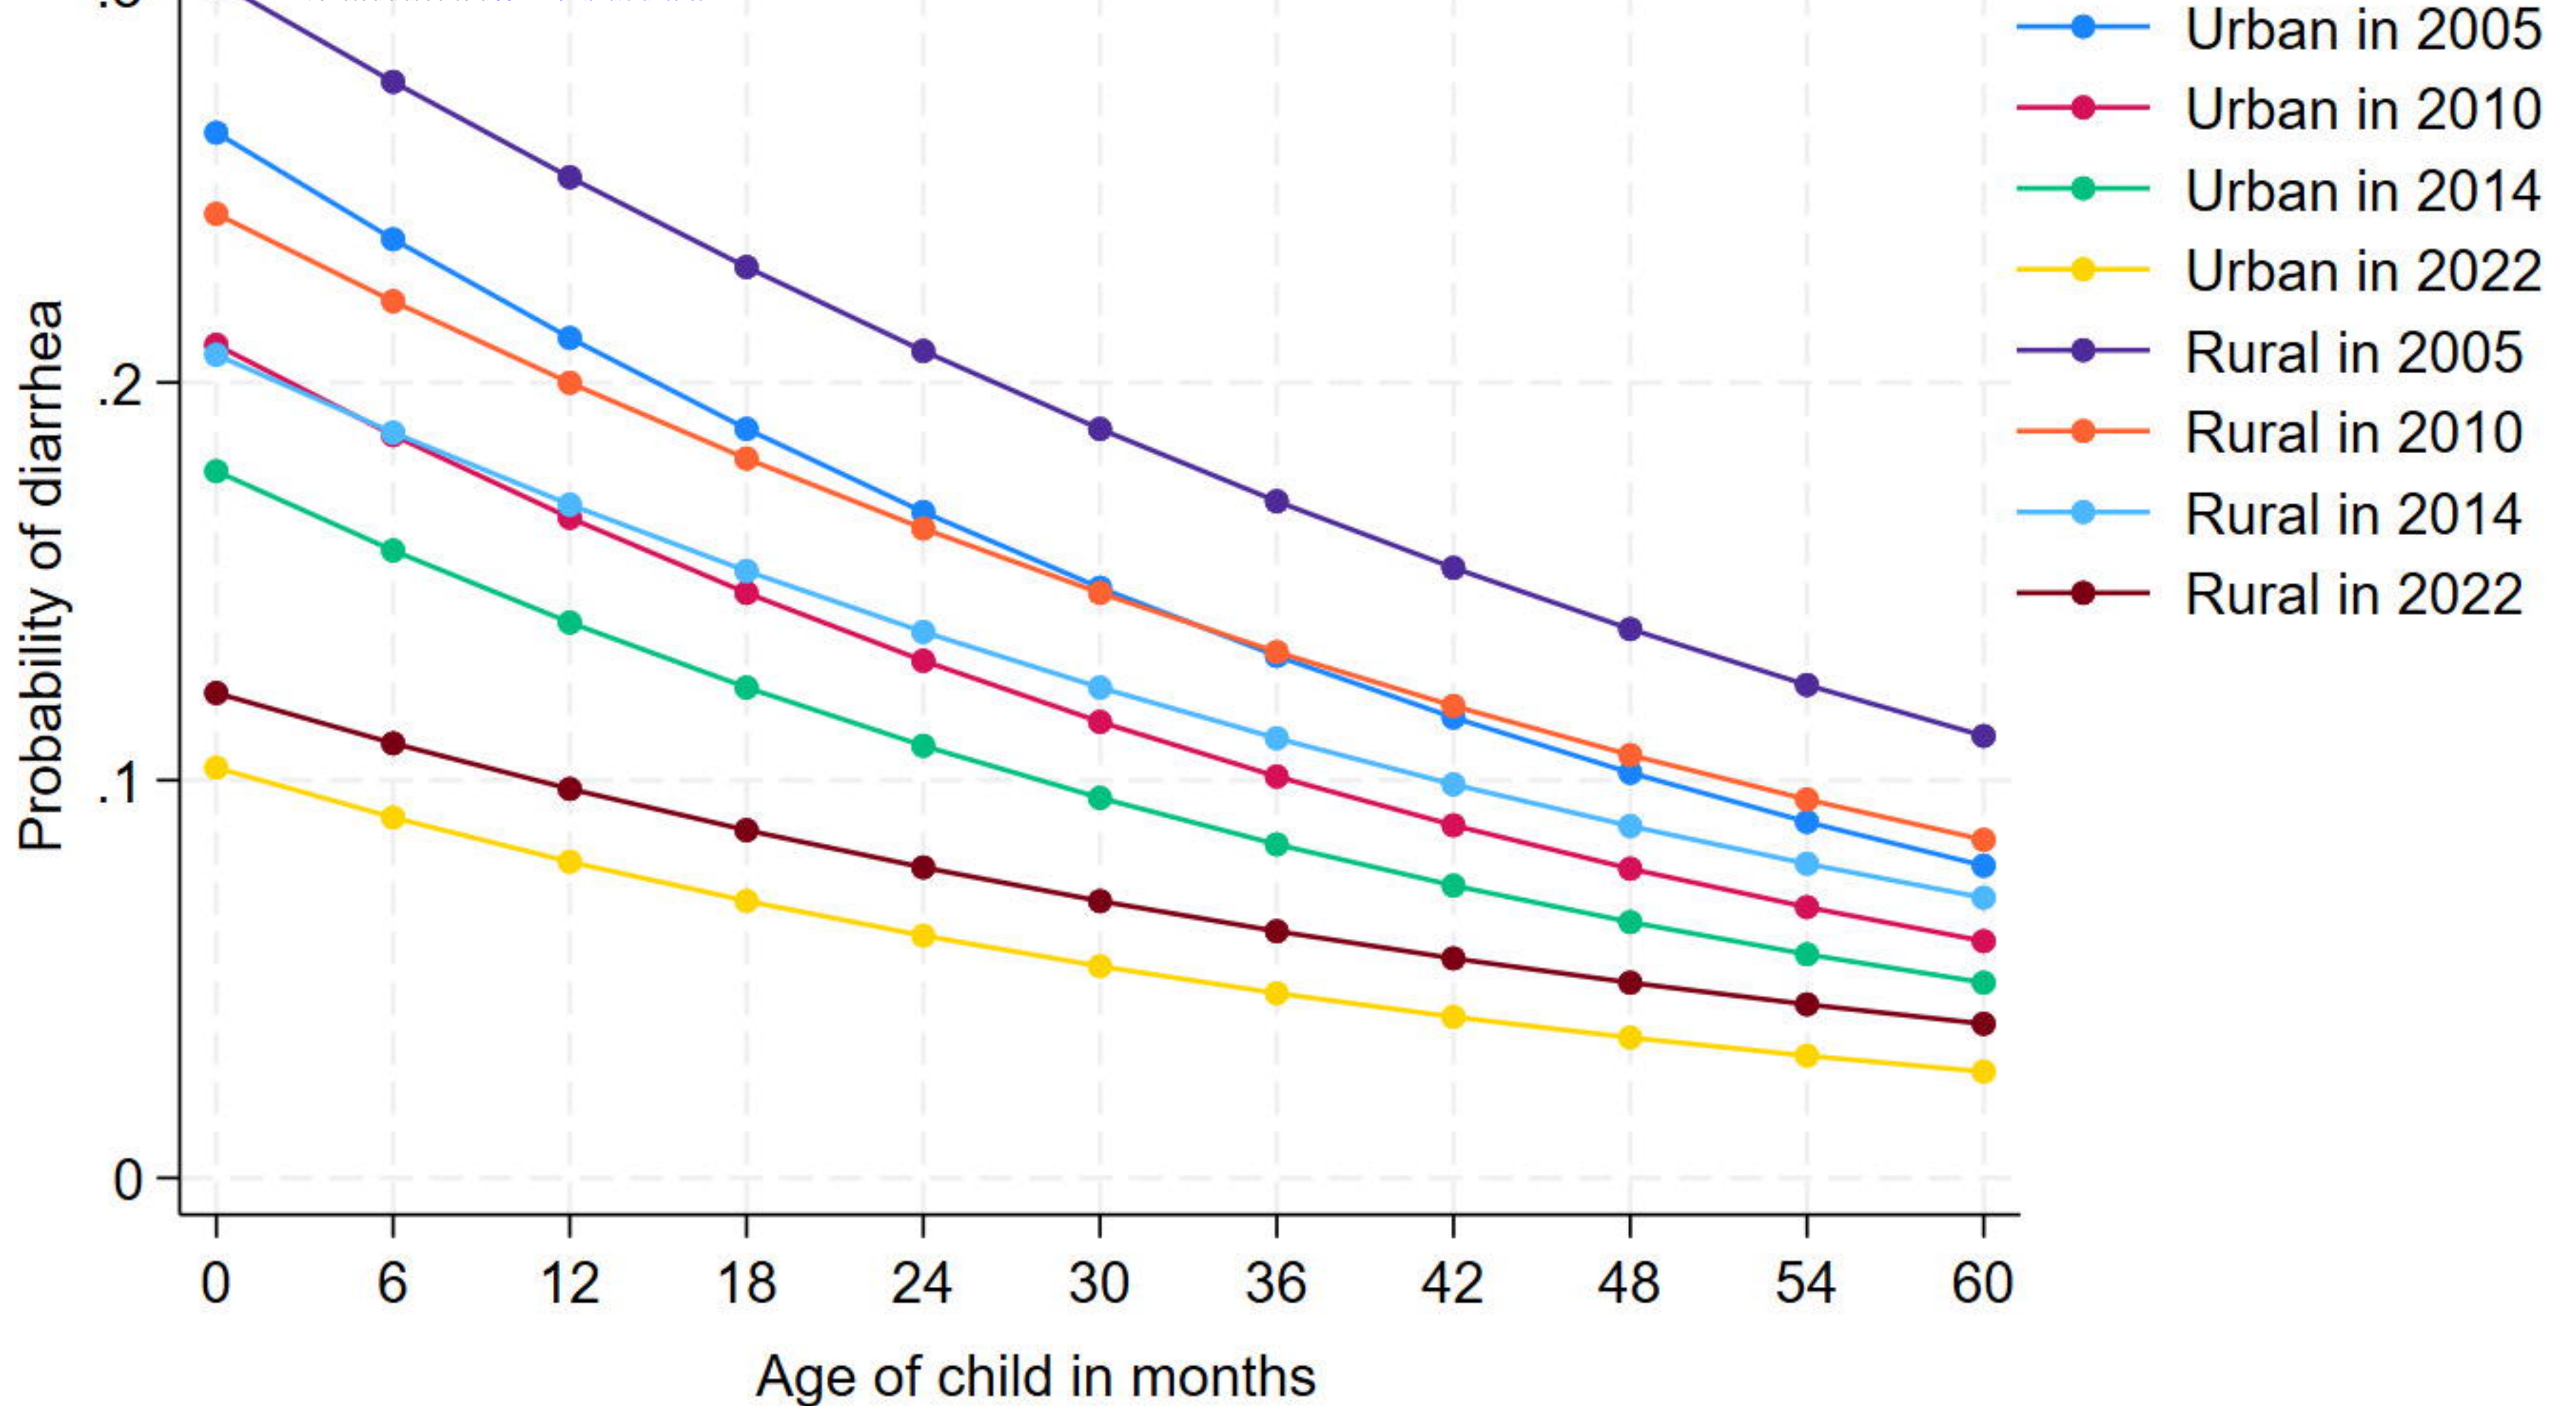

Source: https://medrxiv.org/content/medrxiv/early/2024/05/08/2024.05.08.24307034.full.pdf
